# Supplementary material
Source: PubMed Central journal article supplement (PMC4443378)
Supplement: pnas.1418736112.sapp.pdf [file pnas.1418736112.sapp.pdf]

## Supporting information

### **The membrane remodelling protein Pex11p activates the GTPase Dnm1p during peroxisomal fission**

**Chris Williams<sup>1</sup>, Lukasz Opalinski<sup>1,2,3</sup>, Christiane Landgraf<sup>4</sup>, Joseph Costello<sup>5</sup>, Michael Schrader<sup>5</sup>, Arjen M. Krikken<sup>1,2</sup>, Kèvin Knoops<sup>1</sup>, Anita Kram<sup>1,2</sup>, Rudolf Volkmer<sup>4,6</sup> and Ida J. van der Klei<sup>1,2</sup>**

<sup>1</sup>Molecular Cell Biology, Groningen Biomolecular Sciences and Biotechnology Institute, University of Groningen, the Netherlands.

<sup>2</sup>Kluyver Centre for Genomics of Industrial Fermentation, University of Groningen, the Netherlands.

<sup>3</sup>Current address: Institut für Biochemie und Molekularbiologie, ZBMZ Universität Freiburg, Germany.

<sup>4</sup>Institut für Medizinische Immunologie, Charité-Universitätsmedizin Berlin, Germany.

<sup>5</sup>College of Life and Environmental Sciences, Biosciences, University of Exeter, UK.

<sup>6</sup>Leibniz-Institut für Molekulare Pharmakologie (FMP), Berlin, Germany.

## Supporting materials and methods

**Construction of plasmids and strains.** All point mutants were produced with the QuickChange Site-Directed Mutagenesis Kit (Agilent) and all constructs produced by PCR were confirmed by sequencing. To generate the plasmid encoding for amine oxidase promoter ( $P_{AMO}$ ) driven Pex11p, tagged N-terminally with GFP (LMO.GFP-HpPex11), the plasmids pENTR/41- $P_{AMO}$  GFP, pENTR-221-PEX11, pENTR23/Tamo and pDEST-NAT were recombined by a Gateway LR reaction, resulting in plasmid LMO.GFP.HpPex11. The resulting vector was linearized with *AdeI* and transformed into *H. polymorpha* cells.

The *E. coli* expression vector for the RING domain of Pex2p (pCW261) was made as follows: PCR was performed on *H. polymorpha* genomic DNA using primers HpP2 246 *NcoI* (F) and HpP2 330 HIII (R) and the resulting fragment was digested with *NcoI* and *HindIII* and ligated into *NcoI-HindIII* digested pETM30. To produce the *E. coli* expression vector of Dnm1p, PCR was performed on pSNA02 using primers DNM1 1 *PciI* (F) and DNM1 753 *NotI* (R) and the resulting PCR product was digested with *PciI* and *HindIII* and ligated into *NcoI-HindIII* digested pETM30.

pHIPZ17-Nia, the plasmid containing the Pex11 promoter ( $P_{PEX11}$ ) was constructed as follows: to isolate the PEX11 promoter a fragment of 0.9 kb upstream the *PEX11* gene was amplified using primer pex11-1 and pex11-2 and genomic DNA as template. The resulting fragment was digested with *HindIII* and *NotI* and ligated in *HindIII-NotI* digested pHIPZ4-Nia(1) resulting in vector pHIPZ17-Nia.

To obtain WT Pex11p under control of the endogenous promoter ( $P_{PEX11}$ ) complete with C-terminal His<sub>6</sub> tag, PCR was performed on LMO.GFP.HpPex11 with the primer pair Pex11 HIII (F) and Pex11-His *SalI* (R). The resulting fragment was digested with *HindIII* and *SalI* and ligated into *HindIII-SalI* digested pHIPZ17-Nia, resulting in the vector pCW323. The resulting vector was linearized with *BstAPI* and transformed into *H. polymorpha* cells. To produce Pex11-His<sub>6</sub> under control of the alcohol oxidase promoter ( $P_{AOX}$ ), pCW323 was digested with *HindIII* and *SalI* and the digested product was ligated into *HindIII-SalI* digested pHIPZ4-Nia. The resulting vector, pCW329, was linearized with *NsiI* prior to transformation into *H. polymorpha* cells.

All *H. polymorpha* Pex11p point mutants were constructed using pCW323 as template and the primer pairs described in Table S3. The resulting vectors were digested with *BstAPI* prior to transformation into *H. polymorpha* cells. The vector for overexpressing Pex11p

L15A/L59A, complete with C-terminal His<sub>6</sub>-tag, was made by digesting pCW340 with *HindIII* and *SalI* and the resulting fragment was ligated into *HindIII-SalI* digested pHIPZ4. The resulting vector, pCW342, was linearized with *NsiI* and transformed into *H. polymorpha* cells.

*pex11Δ* cells expressing DNM1-GFP in under control of its own promoter (P<sub>DNM1</sub>) or the amine oxidase promoter (P<sub>AMO</sub>) were produced as follows: plasmids pSNA01 (P<sub>DNM1</sub>) and pSNA02 (P<sub>AMO</sub>) were linearized with *BstI* and *NarI*, respectively, and transformed into *H. polymorpha pex11Δ* cells. The *dnm1Δ* overexpressing PEX11 was produced as follows: plasmid pHIPZ4 PEX11 was linearized with *NsiI* and transformed into *H. polymorpha* cells.

Transformation of *H. polymorpha* was performed as described (2). Transformants were selected based on their ability to grow on YPD medium supplemented with 100 μg/ml nourseothricin or zeocin (Invitrogen). All integrations were confirmed by colony polymerase chain reaction (PCR).

Mammalian Pex11β point mutants were produced using pcDNA3 containing human PEX11 β as template (3) and the primer pairs listed in Table S3.

**Cell extracts and general biochemical techniques.** Crude extracts of *H. polymorpha* cells were prepared as described (4). Specific polyclonal antibodies directed against *H. polymorpha* Pex11p, dihydroxyacetone synthase (DHAS), Elongation factor 1α, *H. polymorpha* Dnm1p (Fig. S9), *S. cerevisiae* Dnm1p (a kind gift from J. Nunnari, University of California), the His<sub>6</sub>-tag (Santa Cruz Biotechnology) and the GST tag (Pierce antibodies) and monoclonal antibodies against GFP (Santa Cruz Biotechnology) were used.

Lysates of transfected COS-7 cells were prepared by addition of lysis buffer (10 mM Tris-HCl pH 7.5, 150 mM NaCl, 0.5 mM EDTA, 0.5 % NP40, 0.5 % Triton X-100, 1 mM PMSF and Protease Inhibitor Cocktail (Roche Applied Sciences)) followed by incubation at 4°C with rotation for 15 min. Insoluble material was pelleted by centrifugation at 15,000g for 15 min and the supernatant collected. The subsequent western blots were probed with antibodies directed against the Myc-tag (mouse monoclonal, epitope 9E10, Santa Cruz Biotechnology) and α-tubulin (mouse monoclonal, Sigma-Aldrich).

**Expression and purification of proteins from *E. coli*.** *H. polymorpha* Dnm1p and Pex2 RING domain, complete with cleavable His<sub>6</sub>-GST tag, were produced in the *E. coli* strain BL21 (DE3) RIL. Cells were grown at 37°C to an OD600 of 1.5 in Terrific Broth (TB)

medium supplemented with antibiotics, transferred to 21°C and grown further until an OD<sub>600</sub> of 2.0. Protein expression was then induced with 1 mM IPTG (Invitrogen) for 16 h and cells were harvested by centrifugation. *E. coli* cell pellets expressing His<sub>6</sub>GST-Dnm1p or His<sub>6</sub>GST-Pex2 RING were thawed in Dnm1 lysis buffer (50 mM Tris-HCl, 150 mM NaCl, 10 mM MgCl<sub>2</sub>, 5 % glycerol, 2 mM β-mercaptoethanol, 2 mM PMSF, pH 7.4), treated with 1 mg/ml lysozyme and then passed through a French press. Cell debris was removed by centrifugation and lysates were loaded onto glutathione sepharose-4B resin (GE Healthcare) pre-equilibrated with Dnm1 lysis buffer. The resin was extensively washed with Dnm1 lysis buffer and His<sub>6</sub>-GST tagged proteins were eluted with Dnm1 lysis buffer containing 20 mM reduced glutathione. For *in vitro* pull down assays, His<sub>6</sub>GST-Pex2 RING was gel filtrated into Dnm1 storage buffer (25 mM Tris pH 7.4, 150 mM NaCl, 10 mM MgCl<sub>2</sub>, 5 % glycerol, 1 mM β-mercaptoethanol) with a Superdex 75 (16/60) column (GE Healthcare). For peptide blot analysis, His<sub>6</sub>GST-Dnm1p was passed over a Superose 6 (10/300) column equilibrated with Dnm1 storage buffer.

For *in vitro* pull down and GTPase activity experiments using Dnm1p, the His<sub>6</sub>GST tag was removed by cleavage with His<sub>6</sub>-TEV (ratio TEV:His<sub>6</sub>GST-Dnm1p 1:25) and the sample was applied to Ni-NTA resin to remove the His<sub>6</sub>GST tag, TEV and undigested fusion protein. Dnm1p was purified further by gel filtration on a Superose 6 (10/300) column equilibrated with Dnm1 storage buffer. Purified Dnm1p was also used to develop polyclonal antibodies against *H. polymorpha* Dnm1p in rabbits (Eurogentec).

Human Drp1 isoform 2 complete with N-terminal His<sub>6</sub> tag was produced the *E. coli* strain BL21 (DE3) RIL. Cells were grown at 37°C to an OD<sub>600</sub> of 0.4 in Terrific Broth (TB) medium supplemented with antibiotics, transferred to 18°C and grown further until an OD<sub>600</sub> of 1.5. Protein expression was then induced with 40 μM IPTG (Invitrogen) for 16 h and cells were harvested by centrifugation. His<sub>6</sub>-Drp1 was purified as described in (5) but the His<sub>6</sub> tag was not removed, to allow detection using anti-His<sub>6</sub> antibodies. The protein was finally gel filtrated into 20 mM HEPES, 300 mM NaCl, 2.5 mM MgCl<sub>2</sub>, 2.5 mM dithiothreitol, pH 7.5.

Purity of recombinant proteins was monitored by SDS PAGE analysis and protein concentration was estimated using a Nanodrop<sup>TM</sup> (www.nanodrop.com).

**Binding assays.** For co-immunoprecipitation, cells (50 A<sub>600</sub> units) were lysed with glass beads in 500 μl lysis buffer (phosphate buffer saline (PBS) pH 8, 0.5% IGEPAL, 1 mM PMSF, 1 mM 2-mercaptoethanol) at 4°C. Debris was removed by centrifugation and lysates

were incubated with 5 µl anti-Dnm1p at 4°C. After 2 h, Protein A-Sepharose beads (GE Healthcare) were added and lysates were incubated for 1 h at 4°C. Precipitates were washed twice with lysis buffer and once with PBS and elution was carried out in 50 µl 125 mM Tris, pH 6.8, 1.5% SDS, 20% glycerol for 5 min at 95°C. Samples were then split in two and to one fraction 5 % (final concentration) 2-mercaptoethanol was added, to reduce disulphide bonds present in the IgGs, aiding Dnm1p detection. Samples were analysed by SDS-PAGE and immunoblotting.

For *in vitro* pull downs, purified His<sub>6</sub>GST-Pex2 RING or Pex11-His<sub>6</sub> variants were incubated with Ni-NTA resin for 30 min at 4°C with gentle rotation in Pex11p storage buffer. Columns were washed with Pex11p storage buffer and incubated with purified Dnm1p for 1 h at 4°C with gentle rotation. Columns were washed with Pex11p storage buffer and elution was performed with Pex11p storage buffer containing 500 mM imidazole. Samples were analysed by SDS-PAGE and western blotting.

**Expression and purification of Pex11p from *H. polymorpha* cells.** *H. polymorpha* cells harbouring WT and L15A/L59A forms of Pex11-His<sub>6</sub> were grown for 16 h on mineral media containing 0.05 % glycerol and 0.5 % methanol. Cells were harvested by centrifugation (10 min, 6,000 rpm), resuspended in Hp lysis buffer (50 mM Tris-HCl, 300 mM NaCl, 10 mM imidazole pH 8.0) with Complete protease inhibitors (Roche) and disrupted using a French Press. Membrane fractions were separated from soluble proteins by centrifugation (10,000 x g for 1 h at 4°C) and membrane proteins were extracted from the pellet fractions by gentle stirring in Hp washing buffer 1 (50 mM Tris-HCl, 300 mM NaCl, 20 mM imidazole, 5 % glycerol, 0.2 % IGEPAL CA-630, pH 8.0) for 1 h at 4°C. Extracted proteins were recovered by centrifugation (10,000 x g at 4°C for 1 h) and the supernatant was incubated with Ni-NTA resin (Qiagen) for 1 h at 4°C. The column was extensively washed with Hp washing buffer 1 and 2 (50 mM Tris-HCl, 600 mM NaCl, 40 mM imidazole, 5 % glycerol, 0.2 % IGEPAL CA-630, pH 8.0) and bound proteins were eluted with elution buffer (50 mM Tris-HCl, 300 mM NaCl, 250 mM imidazole, 5 % glycerol, 0.1 % IGEPAL CA-630, pH 8.0). Finally, Pex11-His<sub>6</sub> proteins were passed through HiTRAP<sup>TM</sup> desalting columns (GE Healthcare) equilibrated with Pex11p storage buffer (25 mM Tris-HCl, 150 mM NaCl, 20 mM imidazole, 5 % glycerol, 0.1 % IGEPAL CA-630, pH 8.0). The purification process was monitored with SDS-PAGE and coomassie brilliant blue staining (Fig. 3B). Pex11-His<sub>6</sub> concentration was determined using the RC/DC Protein Assay kit (Bio-Rad).

Purification of Pex11-His<sub>6</sub> for use in *in vitro* GTPase assays was performed in essentially the same manner except that DDM (GLYCON Biochemicals GmbH) was used as detergent instead of IGEPAL. The buffer used to extract Pex11-His<sub>6</sub> from membrane fractions contained 1 % DDM, whereas all other buffers contained 0.03 %.

**Binding of His<sub>6</sub>GST-Dnm1p and Drp1 to peptide blots.** *In vitro* binding of purified His<sub>6</sub>GST-Dnm1p or His<sub>6</sub>GST to the cellulose membrane-bound Pex11p peptides was analysed as follows: peptide arrays were blocked with blocking buffer (Casein Blocking Buffer (Sigma) containing 5 % saccharose) for 3 h at room temperature (RT). After washing with Tris buffer (50 mM Tris HCl, 300 mM NaCl, 10 mM MgCl<sub>2</sub> and 10 % Glycerol, pH 8), the arrays were incubated with His<sub>6</sub>GST-Dnm1p or His<sub>6</sub>GST in blocking buffer (50 µg/ml) overnight at 4°C. The arrays were washed with Tris buffer and incubated first with mouse anti-poly His tag antibody (H1029, Sigma) at RT for 2 h, followed by HRP-labelled anti-mouse antibody (A5906, Sigma) at RT for 1.5 h. Visualization of membrane-bound proteins was carried out using a chemiluminescence substrate (UptiLight, Uptima) and a Lumi-Imager (RocheDiagnostics). Analyses of SPOT signal intensities was performed with the software Genespotter (Micro-Discovery, Berlin, Germany). To assess the binding of Dnm1p to WT and a mutant form of the amphipathic helix of Pex11p, where Leu59, Leu62 and Phe63 were altered to Alanines, a dilution series of the peptides in TBS (10 mM Tris-HCl, 150 mM NaCl) was spotted onto nitrocellulose. The blot was allowed to dry and then blocked in TBS containing 2 % (w/v) milk powder for 1 h at RT. After extensive washing with Tris buffer, the blot was incubated with Dnm1p (50 µg/ml) in Tris buffer containing 0.25 % milk powder overnight at 4°C. The blot was extensively washed with Tris buffer and probed using antibodies directed against *H. polymorpha* Dnm1p.

The binding of Drp1 to WT and the W4A mutant form of helix 1 from Pex11β was performed as described above, except that due to their hydrophobicity, peptides were dissolved 50 % ethanol prior to being spotted onto nitrocellulose and the resulting blot, after incubation with purified Drp1, was probed using Penta-His antibodies (Qiagen). Peptide concentrations were determined using the RC/DC Protein Assay kit (Bio-Rad).

**GTPase activity measurements.** Reactions containing Dnm1p (0.8 µM), with or without Pex11p peptides (8 µM) or purified Pex11-His<sub>6</sub> (3 µM) were performed in 25 mM Tris pH 7.4, 150 mM NaCl, 5 mM MgCl<sub>2</sub>, 1 % glycerol, 1 mM β-mercaptoethanol at 37°C. When

Pex11-His<sub>6</sub> was added, reactions also contained 0.03 % DDM. Reactions were pre-incubated at room temperature for 30 min, followed by 5 min at 37 °C and were initiated by the addition of GTP. Samples were taken at the indicated time points and terminated by the addition of Gold lock reagent. After 5 min incubation, stabilizer was added and the reaction was incubated for 30 min at room temperature to allow the colour to develop. Phosphate release was determined by measuring the absorbance of the reaction mixtures at 635 nm using a Multiskan™ GO Microplate Spectrophotometer (Thermoscientific). Values were background subtracted and compared to a standard phosphate curve. For time course analysis, reactions were initiated by the addition of 100 µM GTP. For steady-state kinetic analysis on Dnm1p, GTP assays were performed with variable concentrations of GTP (0, 50, 100, 250, 500, 750 and 1,000 µM) and samples were removed every 5 min for 20 min to determine the initial velocity. GTPase activity measurements conducted with purified Drp1 (0.4 µM), in the presence or absence of Pex11p peptides (4 µM) were conducted in essentially the same way as with Dnm1p, except that reactions were performed in 25 mM Tris pH 7.4, 150 mM NaCl, 5 mM MgCl<sub>2</sub> and the GTP concentrations used for steady-state kinetic analysis were 0, 50, 100, 200, 400, 800 and 1,600 µM.

**Extraction of peroxisomal membrane proteins.** The behaviour of Pex11p upon extraction of organellar fractions by different reagents was analysed using fractions enriched in peroxisomes as starting material (6). Organellar fractions (150 µg of protein) were extracted sequentially with 0.1 M Tris pH 8.0 followed by 0.1 M Tris, 1 M NaCl pH 8.0 and 0.1 M Na<sub>2</sub>CO<sub>3</sub> pH 11.5. After the incubations membrane pellets were obtained by ultracentrifugation (15 min at 100,000 x g at 4° C). Both supernatant and pellet fractions were precipitated with 12.5 % TCA. The resulting samples were analysed by SDS-PAGE and western blotting using antibodies directed against Pex11p and DHAS.

**Fluorescence microscopy on COS-7 cells.** Microscopy analysis was performed using an Olympus IX81 microscope (Olympus Optical) equipped with a PlanApo 100x/1.40 oil objective and filter sets 41020 and 41004 (Chroma). Images were acquired with a Photometrics CoolSNAP HQ2 CCD camera (Roper Scientific, Germany) driven by MetaMorph software (MDS Analytical Technologies). Antibodies used are as follows: rabbit polyclonal antibodies against Pex14p (kindly provided by D. Crane, Griffith University) and Drp1 (7) and mouse monoclonal anti-myc (Santa Cruz Biotech). Species-specific anti-IgG

antibodies conjugated to the fluorophorescent Alexa 594 and Alexa 488 were obtained from BioRad (Richmond) and Invitrogen (Life Technologies).

**Quantification of peroxisomes and statistical analysis of data.** Peroxisome numbers were quantified in the yeast *H. polymorpha* using fluorescence and brightfield microscopy images. Cells were detected with a custom-made plugin for ImageJ. Using the brightfield image slices as input, the cells are approximated by a 3-dimensional ellipsoid. For the detection of peroxisomes, another plugin was developed. This plugin uses the data from the fluorescent channel and was designed to parse clumps of peroxisomes. For this, clumps of connected peroxisomes are isolated on each z-slice. Next, the outline of each peroxisome clump is described by a chain of interconnected nodes. Concave regions in the chain indicate a transition between two adjacent peroxisomes. The convex regions between these transitions are then used to fit circles. Finally, the data from all the z-slices are combined, and the separate peroxisomes are described as spheres.

For quantitative evaluation of organelle morphology in mammalian cells, 100-200 cells per coverslip were examined by fluorescence microscopy and categorized accordingly. Usually, three coverslips per preparation were analysed, and at least three independent experiments were performed.

The number of peroxisome profiles based on electron microscopy images was estimated from at least 200 randomly selected cell sections. Numbers correspond to the average number of peroxisome profiles per cell section +/- standard deviation across two separate EM grids. In addition, the number of peroxisomes per cell was quantified using serial sections of 20 randomly selected cells per strain.

Significant differences between experimental groups were detected by analysis of variance for unpaired variables using Microsoft Excel and GraphPad Prism 5 software. Data are presented as means  $\pm$  SEM, with a two-tailed unpaired *t*-test used to determine statistical differences. *P* values <0.05 are considered as significant, and *P* values <0.01 are considered as highly significant.

**Fluorescence Protease Protection assay.** For the analysis of the membrane topology of *H. polymorpha* Pex11p, cells producing DsRed-SKL and either GFP-Pex11 or Pex11-GFP were grown for 16 h in mineral media supplemented with glycerol/methanol (to induce production of DsRed-SKL) and methylamine (for induction of expression of the GFP fusion proteins).



Organelle fractions were isolated according to (6) and analysed by fluorescence microscopy. Organelle fractions (2 mg/ml of total proteins) were supplemented with trypsin (2 mg/ml), incubated for 1 h at 4°C and analysed by fluorescence microscopy. The decrease in the intensities of GFP and DsRed fluorescence was measured using ImageJ software for at least 50 organelles and the average ratio of GFP/DsRed fluorescence was plotted.

## Supporting results

### ***Hansenula polymorpha* Pex11p is an integral component of the peroxisomal membrane.**

Previous reports have demonstrated that Pex11p is an integral membrane protein in humans and trypanosomes (8, 9) yet Pex11p from *S. cerevisiae* appears to be a peripheral membrane protein (10). Therefore, we analysed the topology of *H. polymorpha* Pex11p, to gain insight into the structural properties of the protein (Fig. S2A). To this end, purified organelle fractions, enriched for mitochondria and peroxisomes, were subjected to high salt or high pH treatment. Pex11p was not extracted from peroxisomes treated with 1 M NaCl or sodium carbonate (pH 11.5) while under these conditions, the peroxisomal matrix protein dihydroxyacetone synthase (DHAS) was detected in supernatant fractions, indicating that Pex11p from *H. polymorpha* is an integral membrane protein, like its human and trypanosomal counterparts.

To study the orientation of the N- and C- termini of Pex11p *in vivo*, a Fluorescence Protease Protection assay (FPP) was used (11). In the FPP assay the plasma membrane of cells producing Pex11p, fused N- or C- terminally to GFP, together with the matrix marker DsRed-SKL, was selectively permeabilised with digitonin. These cells were subsequently treated with protease to digest all cytosolic accessible content, whereas internal organelle constituents are protected by the organelle membrane. Organelle fractions of cells producing DsRed-SKL and GFP-Pex11 or Pex11-GFP (both localize to the peroxisome membrane, Fig. S2B) were isolated, treated with Proteinase K and analysed by fluorescence microscopy. A strong reduction of GFP fluorescence was observed for both GFP-Pex11 and Pex11-GFP in comparison to DsRed fluorescence (Fig. S2C) suggesting that both termini of Pex11p are located on the cytosolic surface of the peroxisomal membrane.

**Helix 1 of Pex11 $\beta$  can stimulate the GTPase activity of Drp1 *in vitro*.** To determine whether mammalian Pex11 $\beta$ , like its *H. polymorpha* counterpart, also possessed GAP

activity, we assessed the effect of peptides derived from Pex11 $\beta$  on the GTPase activity of Drp1. To achieve this, we produced two peptides of Pex11 $\beta$ : the first peptide corresponding to the first 12 amino acids of Pex11 $\beta$ , which we termed Pex11 $\beta$  helix 1. This peptide covers the region of Pex11 $\beta$  that demonstrates high sequence and secondary structure homology with that of binding site B1 from *H. polymorpha* Pex11p (Fig. S3). The second corresponded to amino acids 40 to 75, which we termed Pex11 $\beta$  Amph, and was designed to cover the region in Pex11 $\beta$  that is highly similar to the amphipathic helix of *H. polymorpha* Pex11p. Addition of Pex11 $\beta$  Amph did not affect the activity of Drp1 *in vitro* (Fig. S7C) whereas inclusion of Pex11 $\beta$  helix 1 caused a small increase in the GTPase activity of Drp1. This peptide also binds to Drp1 *in vitro* (Fig. S8B). To investigate whether this apparent increase represented a significant gain in activity, we determined the kinetic parameters of Drp1 in the presence and absence of Pex11 $\beta$  helix 1 (Fig. S7D & E). Purified Drp1 (Fig. S7B) displayed a maximum velocity ( $V_{max}$ ) of  $1.63 \pm 0.03 \mu\text{M Pi released min}^{-1}$ . Recently, Bustillo-Zabalbeitia *et al* (12) reported a similar value for the  $V_{max}$  of Drp1 ( $1.6 \mu\text{M Pi released min}^{-1}$ ). Addition of the peptide Pex11 $\beta$  helix 1 resulted in a small but significant ( $p < 0.01$ ) increase in the  $V_{max}$  of Drp1 (Fig. S7E), establishing that Pex11 $\beta$  possesses the ability to stimulate the GTPase activity of Drp1.

**Table S1. Quantification of peroxisome numbers using fluorescence microscopy**

| Strain        | Average no. peroxisomes per cell* |
|---------------|-----------------------------------|
| <i>pex11Δ</i> | 0.73 ± 0.25                       |
| WT            | 4.39 ± 0.03                       |
| L15A          | 4.19 ± 0.04                       |
| L59A          | 4.50 ± 0.38                       |
| L15A/L59A     | 2.94 ± 0.04                       |

\* Average of two independent cultures. At least 1300 cells were counted per culture.

**Table S2. Plasmids used in this study**

| Name                          | Description                                                                                                                        | Reference  |
|-------------------------------|------------------------------------------------------------------------------------------------------------------------------------|------------|
| pEXP-PEX11-GFP                | pDEST <sup>TM</sup> R4-R3 NAT with HpPEX11-GFP under control of amine oxidase promoter (P <sub>AMO</sub> ), Amp <sup>R</sup>       | (13)       |
| pENTR-221-PEX11               | pDONR <sup>TM</sup> 221 with HpPEX11 cDNA without a stop codon; Kan <sup>R</sup>                                                   | (1)        |
| pENTR/41-P <sub>AMO</sub> GFP | pDONR <sup>TM</sup> P4-P1R with P <sub>AMO</sub> GFP, Kan <sup>R</sup>                                                             | (14)       |
| pENTR23/T <sub>AMO</sub>      | Gateway vector containing AMO terminator (T <sub>AMO</sub> )                                                                       | (14)       |
| pDEST-NAT                     | pDEST <sup>TM</sup> R4-R3 with nourseothricin marker, Amp <sup>R</sup>                                                             | (1)        |
| LMO.GFP-HpPex11               | pDEST-NAT containing P <sub>AMO</sub> GFP-HpPEX11 T <sub>AMO</sub> , Amp <sup>R</sup> , Nat <sup>R</sup>                           | This study |
| pHIPZ4 PEX11                  | Plasmid containing P <sub>AOX</sub> HpPEX11                                                                                        | (15)       |
| pCW261                        | His <sub>6</sub> GST HpPex2 RING domain, for expression in <i>E. coli</i> ; Kan <sup>R</sup>                                       | This study |
| pCW283                        | His <sub>6</sub> GST HpDnm1p, for expression in <i>E. coli</i> ; Kan <sup>R</sup>                                                  | This study |
| pSKB-LNB Drp1                 | Modified pET28a plasmid containing His tagged Human Drp1 (isoform 2), for <i>E. coli</i> expression, Kan <sup>R</sup> .            | (5)        |
| pCW323                        | Plasmid containing P <sub>PEX11</sub> HpPEX11 with C-terminal His <sub>6</sub> -Tag; Amp <sup>R</sup> , Zeo <sup>R</sup>           | This study |
| pCW329                        | Plasmid containing P <sub>AOX</sub> HpPEX11 with C-terminal His <sub>6</sub> -Tag; Amp <sup>R</sup> , Zeo <sup>R</sup>             | This study |
| pCW332                        | Plasmid containing P <sub>PEX11</sub> HpPEX11 L59A, with C-terminal His <sub>6</sub> -Tag; Amp <sup>R</sup> , Zeo <sup>R</sup>     | This study |
| pCW339                        | Plasmid containing P <sub>PEX11</sub> HpPEX11 L15A with C-terminal His <sub>6</sub> -Tag; Amp <sup>R</sup> , Zeo <sup>R</sup>      | This study |
| pCW340                        | Plasmid containing P <sub>PEX11</sub> HpPEX11 L15A/L59A with C-terminal His <sub>6</sub> -Tag; Amp <sup>R</sup> , Zeo <sup>R</sup> | This study |
| pCW342                        | Plasmid containing P <sub>AOX</sub> HpPEX11 L15A/L59A with C-terminal His <sub>6</sub> -Tag; Amp <sup>R</sup> , Zeo <sup>R</sup>   | This study |
| pSNA01                        | Plasmid containing C-terminal part of DNMI fused to GFP, Amp <sup>R</sup> , Zeo <sup>R</sup>                                       | (13)       |
| pSNA02                        | Plasmid containing P <sub>AMO</sub> DNMI-GFP.T <sub>AMO</sub> , Amp <sup>R</sup> , Zeo <sup>R</sup>                                | (13)       |
| pMCE7                         | Plasmid containing C-terminal part of PMP47 fused to GFP; Amp <sup>R</sup> ; Zeo <sup>R</sup>                                      | (16)       |
| pcDNA3                        | Plasmid containing HsPex11β-Myc for mammalian expression                                                                           | (3)        |
| pcDNA3 W4A                    | Plasmid containing HsPex11β-Myc W4A mutant, for mammalian expression                                                               | This study |
| pcDNA3 L48A                   | Plasmid containing HsPex11β-Myc L48A mutant, for mammalian expression                                                              | This study |
| pcDNA3 W4A/L48A               | Plasmid containing HsPex11β-Myc W4A/L48A mutant, for mammalian expression                                                          | This study |
| pHIPZ4-Nia                    | Plasmid containing P <sub>AOX</sub> Nia, Amp <sup>R</sup> , Zeo <sup>R</sup>                                                       | (17)       |
| pHIPZ17-Nia                   | Plasmid containing P <sub>PEX11</sub> Nia, Amp <sup>R</sup> , Zeo <sup>R</sup>                                                     | This study |

**Table S3. Oligonucleotides used in this study**

| Name               | Sequence (5' – 3')                                   |
|--------------------|------------------------------------------------------|
| HpP2 246 NcoI (F)  | GCCATGGCTGATCAGAAACAGGATGAAAAGG                      |
| HpP2 330 HIII (R)  | GCGAAGCTTTAGCCGTCGAACACCCGCACAAAC                    |
| DNM1 1 PciI (F)    | GCGCGCGCACATGTCGGCATTGCAAGACC                        |
| DNM1 753 NotI (R)  | GCGCGCGCGCGCCGCTTAAACAACCTTCGCTAATGATAG              |
| Pex11-1            | ATAAGAATGCGGCCGCGTGGACTGCTACGAGACATT                 |
| Pex11-2            | CCCAAGCTTATAACTGTCTGTCTGTCCC                         |
| Pex11 HIII (F)     | GCGCGCGCAAGCTTATGGTTTGCACACGATAAC                    |
| Pex11-His Sall (R) | GCGCGCGCGTGCAGTCACTAGTGGTATGGTATGTAGCACAGAAGACTCGGTC |
| Pex11 L15A (F)     | CCGACTCTCACGAAAGCGATCAACTTCCTCGAGAC                  |
| Pex11 L15A (R)     | GTCTCGAGGAAGTTGATCGCTTTCGTGAGAGTCGG                  |
| Pex11 L59A (F)     | CATTACTATCTGGTGAAGAAGAGCGCAGGATTTGTTACGCG            |
| Pex11 L59A (R)     | GCGTGAACAAATCCTGCGCTCTTCTCACCAGATAGTAATG             |
| Pex11_W4AFor       | AAGCTT GGTACC ATGGACGCCGCCGTCCTCAGTGCTCAGAGC         |
| Pex11_W4ARev       | GCTCTGAGCACTGAAGCGGACGGCGGCGTCCAT GGTACC AAGCTT      |
| Pex11_L48AFor      | TACAGAAACAGATTGACAAGCCGAGAGCCACCTGAGCCTTGG           |
| Pex11_L48ARev      | CCAAGGCTCAGGTGGCTCTCGGCTTGTGCAATCTGTTTCTGTA          |

**Table S4. *H. polymorpha* strains used in this study**

| Strain                                                            | Characteristics                                 | Reference  |
|-------------------------------------------------------------------|-------------------------------------------------|------------|
| Wild type                                                         | NCYC 495                                        | (18)       |
| <i>pex11Δ</i>                                                     | <i>PEX11</i> deletion strain                    | (15)       |
| <i>dnm1Δ</i>                                                      | DNM1 deletion strain                            | (13)       |
| WT + P <sub>DNM1</sub> DNMI-GFP                                   | Wild type cells with pSNA01                     | (13)       |
| WT + P <sub>AMO</sub> DNMI-GFP                                    | Wild type cells with pSNA02                     | (13)       |
| <i>pex11Δ</i> + P <sub>DNM1</sub> DNMI-GFP                        | <i>pex11Δ</i> cells with pSNA01                 | This study |
| <i>pex11Δ</i> + P <sub>AMO</sub> DNMI-GFP                         | <i>pex11Δ</i> cells with pSNA02                 | This study |
| <i>dnm1Δ</i> + P <sub>AOX</sub> PEX11                             | <i>dnm1Δ</i> cells with pHIPZ4 PEX11            | This study |
| <i>pex11Δ</i> + P <sub>AOX</sub> PEX11-His <sub>6</sub>           | <i>pex11Δ</i> cells with pCW329                 | This study |
| <i>pex11Δ</i> + PMP47-GFP                                         | <i>pex11Δ</i> cells with pMCE7                  | This study |
| <i>pex11Δ</i> + PMP47-GFP + WT Pex11-His <sub>6</sub>             | <i>pex11Δ</i> + PMP47-GFP cells with pCW323     | This study |
| <i>pex11Δ</i> + PMP47-GFP + Pex11-His <sub>6</sub> L15A           | <i>pex11Δ</i> + PMP47-GFP cells with pCW339     | This study |
| <i>pex11Δ</i> + PMP47-GFP + Pex11-His <sub>6</sub> L59A           | <i>pex11Δ</i> + PMP47-GFP cells with pCW332     | This study |
| <i>pex11Δ</i> + PMP47-GFP + Pex11-His <sub>6</sub> L15A/L59A      | <i>pex11Δ</i> + PMP47-GFP cells with pCW340     | This study |
| DsRed-SKL                                                         | Wild type cells with P <sub>AOX</sub> DsRed-SKL | (19)       |
| DsRed-SKL + P <sub>AMO</sub> PEX11-GFP                            | DsRed-SKL cells with pEXP-PEX11-GFP             | This study |
| DsRed-SKL + P <sub>AMO</sub> GFP-PEX11                            | DsRed-SKL cells with LMO.GFP-HpPex11            | This study |
| <i>pex11Δ</i> + P <sub>AOX</sub> PEX11-His <sub>6</sub> L15A/L59A | <i>pex11Δ</i> cells with pCW342                 | This study |

## Supporting references

1. Saraya R, Krikken AM, Veenhuis M, & van der Klei IJ (2011) Peroxisome reintroduction in *Hansenula polymorpha* requires Pex25 and Rho1. *J Cell Biol* 193(5):885-900.
2. Faber KN, Haima P, Harder W, Veenhuis M, & Ab G (1994) Highly-efficient electrotransformation of the yeast *Hansenula polymorpha*. *Curr Genet* 25(4):305-310.
3. Schrader M, *et al.* (1998) Expression of PEX11beta mediates peroxisome proliferation in the absence of extracellular stimuli. *J Biol Chem* 273(45):29607-29614.
4. van der Klei IJ, Harder W, & Veenhuis M (1991) Selective inactivation of alcohol oxidase in two peroxisome-deficient mutants of the yeast *Hansenula polymorpha*. *Yeast* 7(8):813-821.
5. Frohlich C, *et al.* (2013) Structural insights into oligomerization and mitochondrial remodelling of dynamin 1-like protein. *EMBO J* 32(9):1280-1292.
6. van der Klei IJ, *et al.* (1998) The *Hansenula polymorpha* per6 mutant is affected in two adjacent genes which encode dihydroxyacetone kinase and a novel protein, Pak1p, involved in peroxisome integrity. *Curr Genet* 34(1):1-11.
7. Yoon Y, Pitts KR, & McNiven MA (2001) Mammalian dynamin-like protein DLP1 tubulates membranes. *Mol Biol Cell* 12(9):2894-2905.
8. Lorenz P, Maier AG, Baumgart E, Erdmann R, & Clayton C (1998) Elongation and clustering of glycosomes in *Trypanosoma brucei* overexpressing the glycosomal Pex11p. *EMBO J* 17(13):3542-3555.
9. Koch J & Brocard C (2012) PEX11 proteins attract Mff and human Fis1 to coordinate peroxisomal fission. *J Cell Sci* 125(Pt 16):3813-3826.
10. Marshall PA, *et al.* (1995) Pmp27 promotes peroxisomal proliferation. *J Cell Biol* 129(2):345-355.
11. Lorenz H, Hailey DW, Wunder C, & Lippincott-Schwartz J (2006) The fluorescence protease protection (FPP) assay to determine protein localization and membrane topology. *Nat Protoc* 1(1):276-279.
12. Bustillo-Zabalbeitia I, *et al.* (2014) Specific interaction with cardiolipin triggers functional activation of dynamin-related protein 1. *PLoS One* 9(7):e102738.
13. Nagotu S, Saraya R, Otzen M, Veenhuis M, & van der Klei IJ (2008) Peroxisome proliferation in *Hansenula polymorpha* requires Dnm1p which mediates fission but not de novo formation. *Biochim Biophys Acta* 1783(5):760-769.

14. Nagotu S, *et al.* (2008) Peroxisome fission in *Hansenula polymorpha* requires Mdv1 and Fis1, two proteins also involved in mitochondrial fission. *Traffic* 9(9):1471-1484.
15. Krikken AM, Veenhuis M, & van der Klei IJ (2009) *Hansenula polymorpha* pex11 cells are affected in peroxisome retention. *FEBS J* 276(5):1429-1439.
16. Cepinska MN, Veenhuis M, van der Klei IJ, & Nagotu S (2011) Peroxisome fission is associated with reorganization of specific membrane proteins. *Traffic* 12(7):925-937.
17. Faber KN, Kram AM, Ehrmann M, & Veenhuis M (2001) A novel method to determine the topology of peroxisomal membrane proteins in vivo using the tobacco etch virus protease. *J Biol Chem* 276(39):36501-36507.
18. Sudbery PE, Gleeson MA, Veale RA, Ledebor AM, & Zoetmulder MC (1988) *Hansenula polymorpha* as a novel yeast system for the expression of heterologous genes. *Biochem Soc Trans* 16(6):1081-1083.
19. Saraya R, Cepinska MN, Kiel JA, Veenhuis M, & van der Klei IJ (2010) A conserved function for Inp2 in peroxisome inheritance. *Biochim Biophys Acta* 1803(5):617-622.
20. Humphrey W, Dalke A, & Schulten K (1996) VMD: visual molecular dynamics. *J Mol Graph* 14(1):33-38, 27-38.

### Supporting figure legends

**Fig. S1. Overproduction of Dnm1p or Pex11p.** (A) Quantification of peroxisome profiles in thin sections of the strains depicted in **Fig. 1**. At least 200 cell sections were used for quantification. Numbers represent the mean number of peroxisomal profiles per section  $\pm$  standard deviation across two separate EM grids (\*  $p < 0.05$ , n.s. statistically not significant). (B) Quantification of peroxisome numbers in serial EM sections of 20 randomly selected *pex11Δ* cells and *pex11Δ* cells overproducing Dnm1-GFP. Numbers represent the mean  $\pm$  standard deviation across the cells (n.s. statistically not significant). (C) Western blots of lysates prepared from WT and *pex11Δ* cells expressing *DNM-GFP* under control of its own promoter (-) or the amine oxidase promoter (+DNM1, for overproduction of Dnm1-GFP) probed with antibodies against GFP and Elongation factor 1 $\alpha$  (loading control). As control a lysate of cells lacking *DNM1* (*dnm1Δ*) is also depicted. (D) Western blots of lysates prepared from *dnm1Δ* cells expressing *PEX11* under control of its own promoter (-) or under the alcohol oxidase promoter (+*PEX11*, for overproduction of Pex11p) probed with Pex11p and

pyruvate carboxylase (Pyc, loading control) antibodies. As control a lysate of cells lacking *PEX11* (*pex11Δ*) is also depicted.

**Fig. S2. Topology of *H. polymorpha* Pex11p.** (A) Organellar fractions isolated from WT *H. polymorpha* cells were sequentially extracted with 0.1 M Tris pH 8.0, 0.1 M Tris 1 M NaCl pH 8.0 and 0.1 M Na<sub>2</sub>CO<sub>3</sub> pH 11.5. In between each extraction step, fractions were subjected to ultracentrifugation. Samples were analysed with SDS-PAGE and Western blotting using antibodies against dihydroxyacetone synthase (DHAS) and Pex11p. DHAS is used as soluble matrix marker (B) Fluorescence microscopy analysis of methanol grown cells producing DsRed-SKL, to mark peroxisomes, and either GFP-Pex11 (left panels) or Pex11-GFP (right panels). Scale bar: 5 μm. (C) Organellar fractions isolated from cells producing DsRed-SKL and GFP-Pex11 or Pex11-GFP were incubated with trypsin (2 mg/ml) for 1 h on ice and analysed by fluorescence microscopy. The intensities of GFP and DsRed fluorescence were measured for at least 50 organelles and the average ratios of GFP to DsRed signals without protease treatment (controls, arbitrarily set to 100 %) and after proteolysis were plotted. Error bars represent standard deviation.

**Fig. S3. Sequence and structural properties of *H. polymorpha* Pex11p.** (A) Domain organisation of *H. polymorpha* Pex11p, displaying the predicted α-helices (H), transmembrane domains (TMD) and the four putative binding Dnm1p binding sites (B1-B4) identified using the peptide blot analysis (**Fig. 4**). Numbers depict amino acid positions. (B) Sequence alignment of *H. polymorpha* Pex11p together with a selection of homologous Pex11p sequences. Black shading indicates identity and grey shading similarity when present in at least four of the eight sequences aligned. Sc, *Saccharomyces cerevisiae*; Pp, *Pichia pastoris*; Pc, *Penicillium chrysogenum*; Hs, *Homo sapiens*; Tb, *Trypanosoma brucei*. Mutating the residues depicted with an asterisk in *H. polymorpha* Pex11p disturbs the interaction between Pex11p peptides and Dnm1p (**Fig. 4**). (C) Sequence alignment of the predicted α-helices that incorporate the Dnm1p binding sites in Pex11p (Helix 1; residues 12-19, Amph helix; residues 55-87). Black shading indicates identity and grey shading similarity. Mutating the residues depicted with an asterisk (Helix 1) or open triangle (Amph helix) disturbs the interaction between Pex11p peptides and Dnm1p (**Fig. 4**). (D) Using the sequences of the Dnm1p binding peptides, 3D models of ideal α-helices were built that correspond to the identified Dnm1p binding sites in Pex11p and superimposed using VMD

(20). The  $\alpha$ -helix containing binding site B1 (Helix 1, residues 12-19) is depicted in magenta, while the  $\alpha$ -helix containing binding site B3 (Amph helix, residues 55-74) in green. The termini of the helices are labelled.

**Fig. S4. Pex11 L15A/L59A causes increased numbers of cells with 1 or 0 peroxisomes and exhibits reduced binding to Dnm1p without compromising growth on methanol containing media.** (A) Quantification of peroxisome numbers in *pex11Δ*, WT and L15A/L59A cells grown on methanol. Values represent the mean  $\pm$  standard error of mean of two independent experiments, with 1000 cells counted in each experiment. The frequency distributions of cells with number of peroxisomes per cell are shown. (B) *In vitro* pull down assay using purified Dnm1p together with Pex11-His<sub>6</sub> or Pex11 L15A/L59A-His<sub>6</sub> bound to Ni-NTA resin. After washing, proteins were eluted from the column using imidazole and analysed by SDS-PAGE and western blotting using antibodies directed against Dnm1p and Pex11p. Elution fractions are 4 times concentrated relative to Input and Flow through fractions. (C) Glucose grown *pex11Δ* cells or *pex11Δ* cells expressing WT or L15A/L59A forms of Pex11p under control of the Pex11p promoter were shifted to methanol containing media and the optical density (OD) at 600 nm was measured at the indicated time points. Graphs represent the mean  $\pm$  standard deviation of four separate experiments.

**Fig. S5. Purified Pex11-His<sub>6</sub> stimulates the GTP activity of Dnm1p *in vitro*.** Time course of GTP hydrolysis by Dnm1p alone (closed circles), Dnm1p in the presence of purified Pex11-His<sub>6</sub> (closed diamonds), Pex11-His<sub>6</sub> (triangles) or buffer alone (crosses). Where absent, the detergent DDM was added to a final concentration of 0.03 %, to mimic reactions that included purified Pex11-His<sub>6</sub>. For comparison, a time course depicting GTP hydrolysis by Dnm1p in the absence of DDM (open circles, Dnm1p w/o DDM) is included.

**Fig. S6. GTP hydrolysis by Dnm1p in the presence and absence of Pex11p peptides.** (A) Time course of GTP hydrolysis by Dnm1p alone (open circles), or in the presence of Pex11p peptides corresponding to binding site B1 (open diamonds), binding site B3 (crosses) and the amphipathic helix of Pex11p (closed squares). (B) GTP hydrolysis by Dnm1p in the absence (diamonds) or presence (triangles) of the amphipathic helix of Pex11p, in low (closed symbols, black lines) or high salt (open symbols, grey lines) buffer. (C) GTP hydrolysis by Dnm1p alone (open circles), Dnm1p in the presence of the amphipathic helix of Pex11p



(closed squares) or a mutant form of the amphipathic helix of Pex11p lacking residues involved in the Dnm1p interaction (closed triangles). (D) *In vitro* binding of Dnm1p to the amphipathic helix of Pex11p (Pex11p Amph) and a mutant form lacking residues involved in the Dnm1p interaction (Pex11p AAA). After the peptides were spotted onto a nitrocellulose membrane (amounts per spot are indicated above the blot), the blot was incubated with purified Dnm1p and probed with antibodies directed against *H. polymorpha* Dnm1p.

**Fig. S7. Helix 1 of mammalian Pex11 $\beta$  stimulates the GTPase activity of Drp1 *in vitro*.**

(A) Domain organisation of *H. sapiens* Pex11 $\beta$ , displaying the predicted  $\alpha$ -helices (H) and transmembrane domains (TMD). The regions of Pex11 $\beta$  corresponding to the peptides used in subsequent studies, termed Helix 1 (residues 1 to 12) and Amph helix (residues 40 to 75) are indicated. Numbers depict amino acid positions. (B) SDS-PAGE and coomassie staining analysis of Drp1 purified from *E. coli*. (C) Time course of GTP hydrolysis by Drp1 (open circles), Drp1 together with a peptide of the amphipathic helix of Pex11 $\beta$  (closed squares) or Drp1 together with a peptide of helix 1 of Pex11 $\beta$  (closed diamonds). (D) Steady state kinetics of GTP hydrolysis by Drp1 in the presence (closed squares) and absence (open circles) of the helix 1 peptide from Pex11 $\beta$ . (F) Kinetic parameters of Drp1 in the presence and absence of the helix 1 peptide from Pex11 $\beta$ . Values represent the mean  $\pm$  standard deviation of three separate measurements (\*\* p<0.01).

**Fig. S8. The W4A mutation in Pex11 $\beta$  does not alter Drp1 localisation but inhibits the Pex11 $\beta$ -Drp1 interaction *in vitro*.**

(A) Drp1 localises in spots on elongated peroxisomes induced by Pex11 $\beta$ -W4A. COS-7 cells were transfected with Pex11 $\beta$ -Myc (A-D) or Pex11 $\beta$ -W4A-Myc (E-H). After 48 h cells were fixed and labelled with anti-Myc (B, F) and anti-Drp1 (C, G) antibodies. (A-D) Pex11 $\beta$ -Myc promotes peroxisome division. Endogenous Drp1 co-localises with Pex11 $\beta$ -Myc at small spherical and elongated peroxisomes (arrows). (E-H) Pex11 $\beta$ -W4A interferes with peroxisome division and result in the accumulation of highly elongated peroxisomes. Endogenous Drp1 localises in spots to Pex11 $\beta$ -W4A-positive elongated peroxisomes (arrows). Higher magnification view of boxed regions (B-D, F-H). Scale bar: 10  $\mu$ m. (I) Binding of Drp1 to peptides corresponding to helix 1 of Pex11 $\beta$  (Pex11 $\beta$  Helix 1) and a mutant form where the Tryptophan residue at position 4 is mutated to an Alanine (Pex11 $\beta$  Helix 1 W4A). After the peptides were spotted onto a nitrocellulose

membrane (amounts per spot are indicated above the blot), the blot was incubated with purified Drp1 and probed with antibodies directed against the His<sub>6</sub> tag present on Drp1.

**Fig. S9. Specificity of *H. polymorpha* Dnm1p antibodies.** Western blots of lysates of WT cells, *dnm1Δ* cells and WT cells overproducing Dnm1-GFP, together with purified Dnm1p from *E. coli*, probed with pre-immune sera (left panel) or sera isolated from a rabbit immunogenized with purified Dnm1p (right panel).

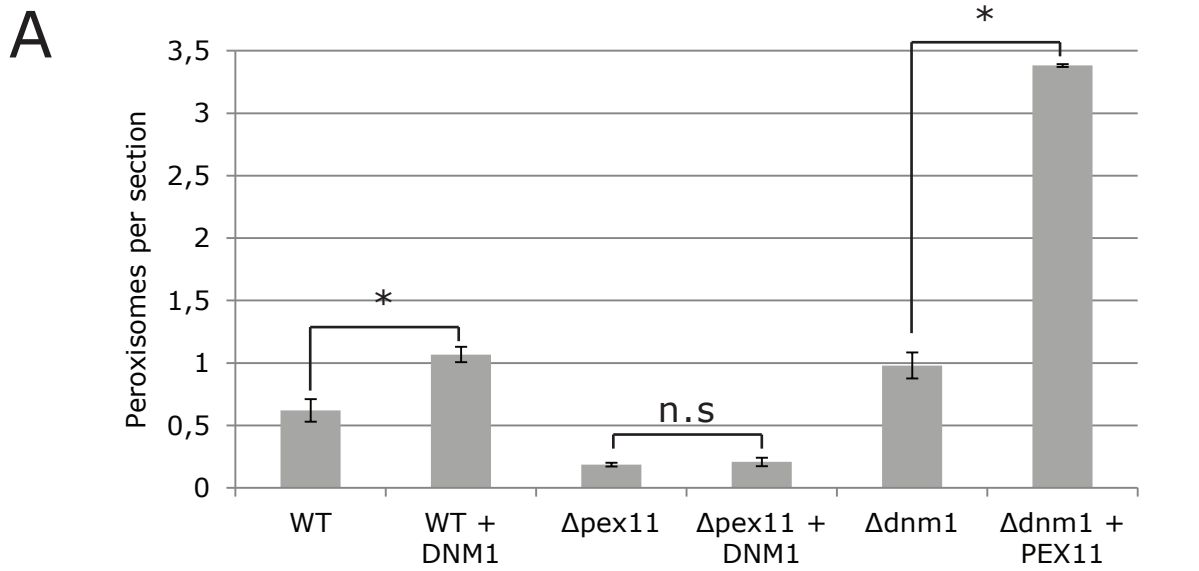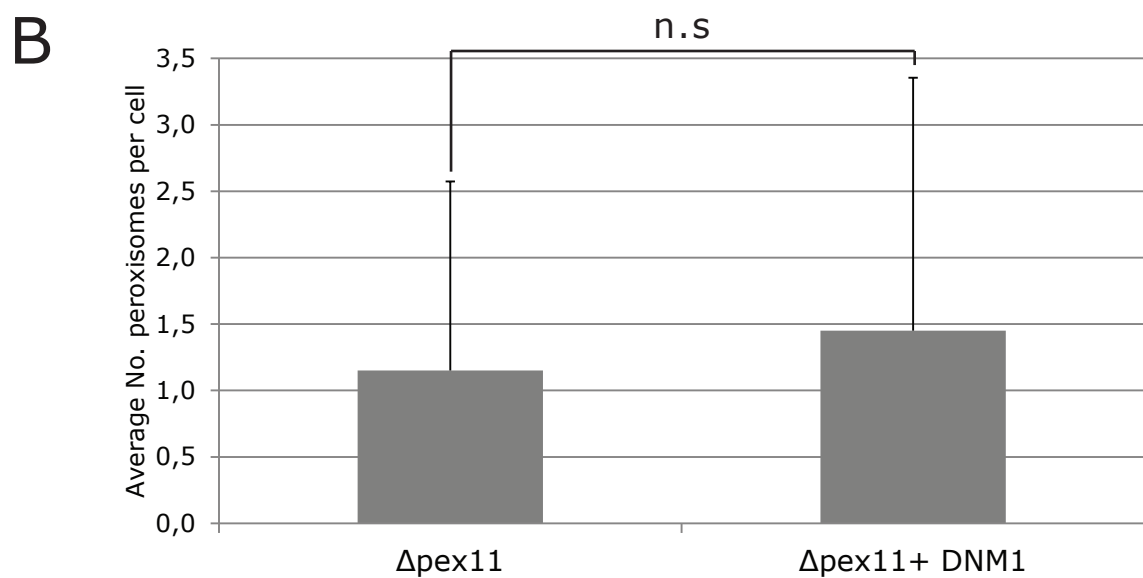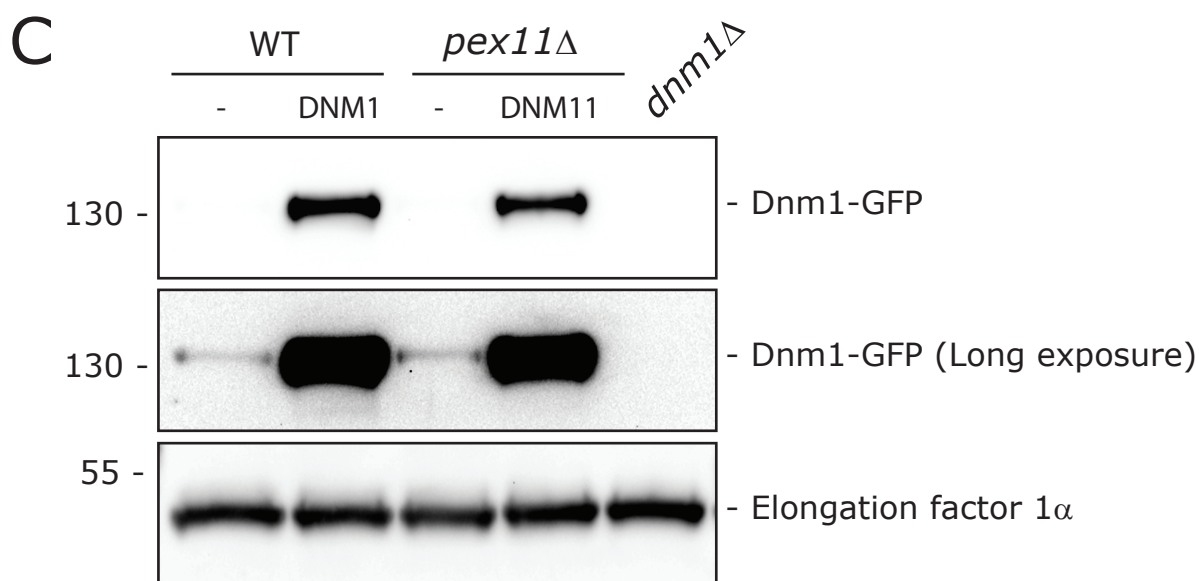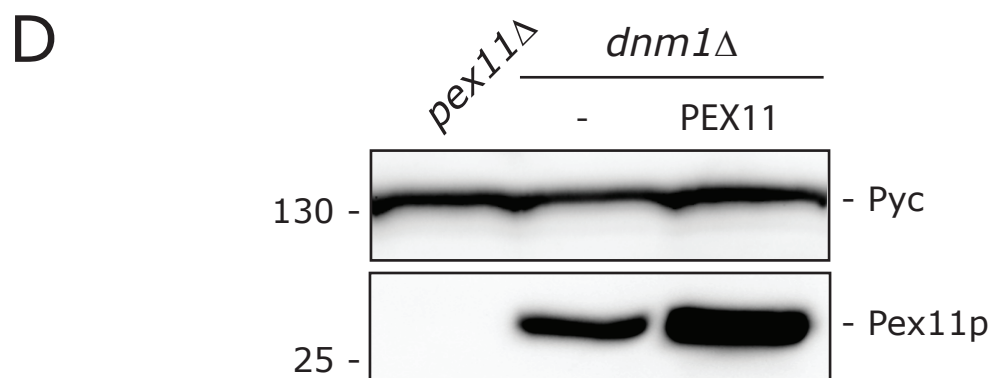

Figure S1

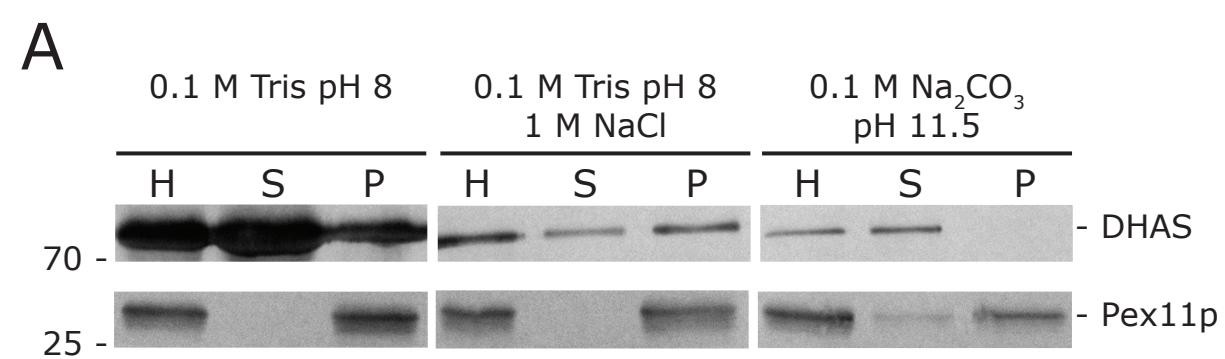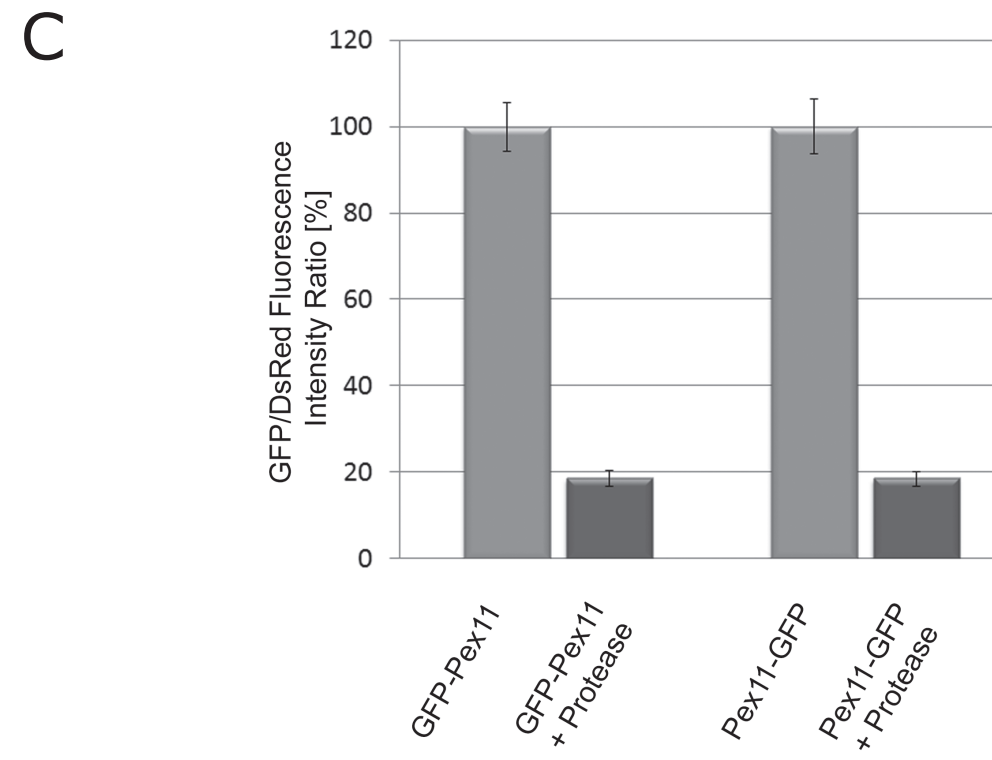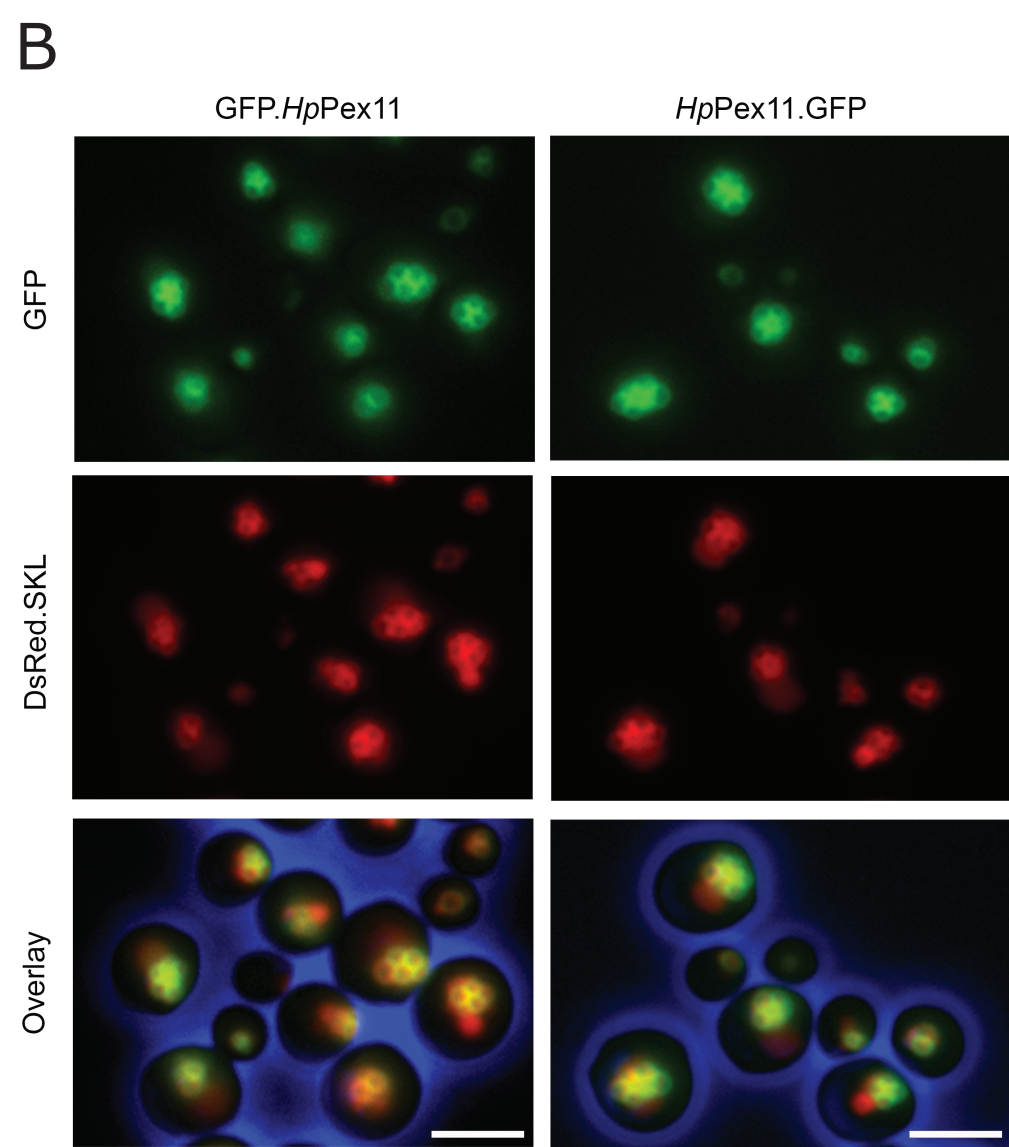

Figure S2

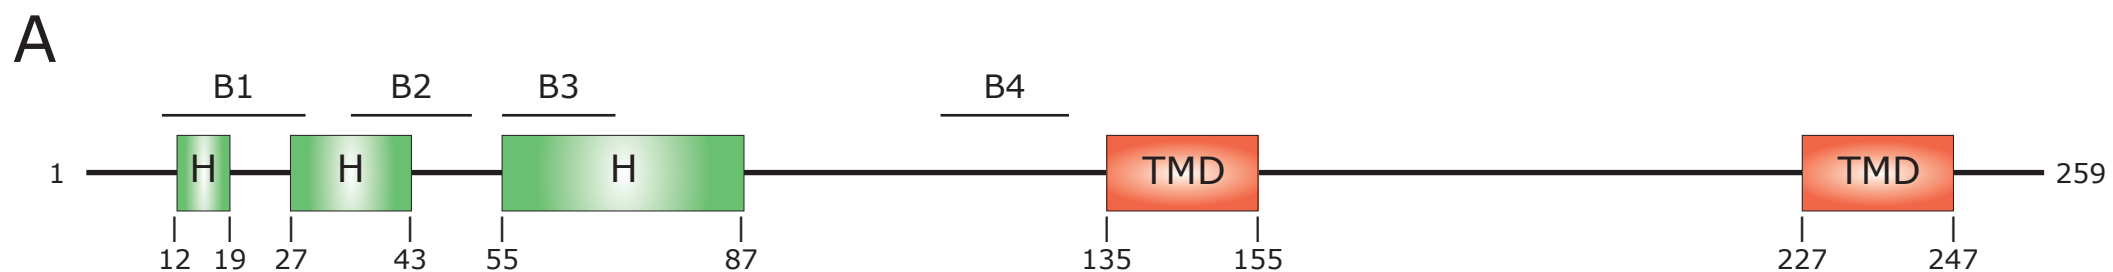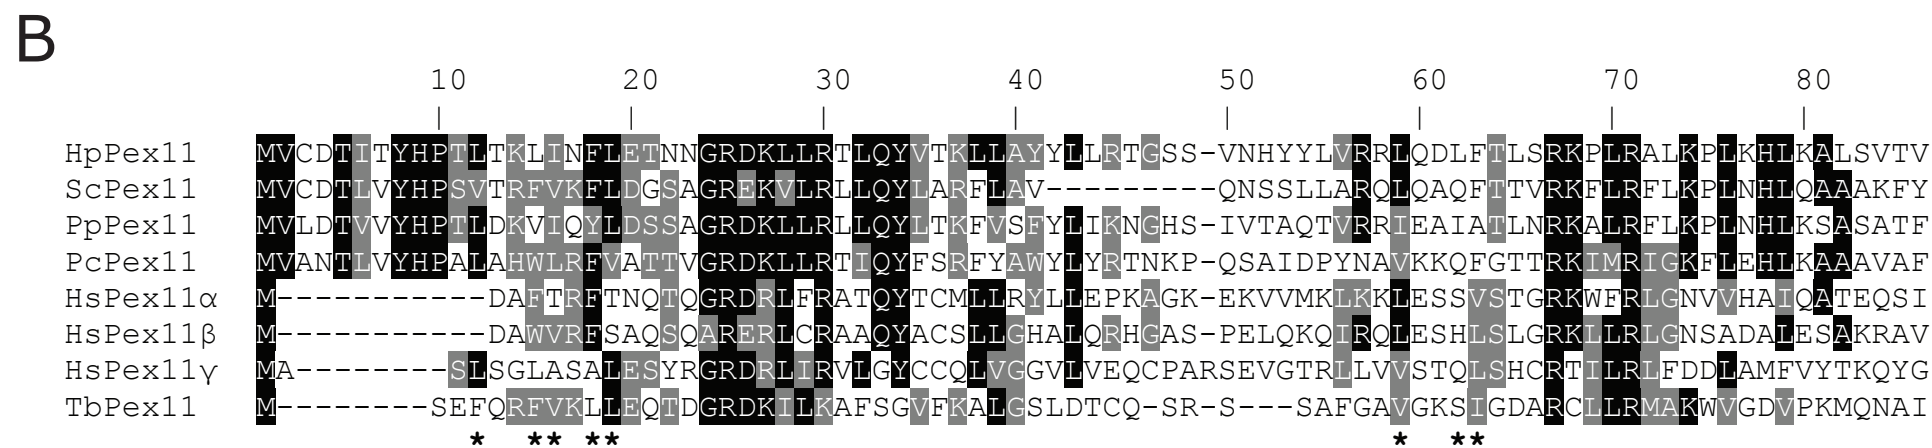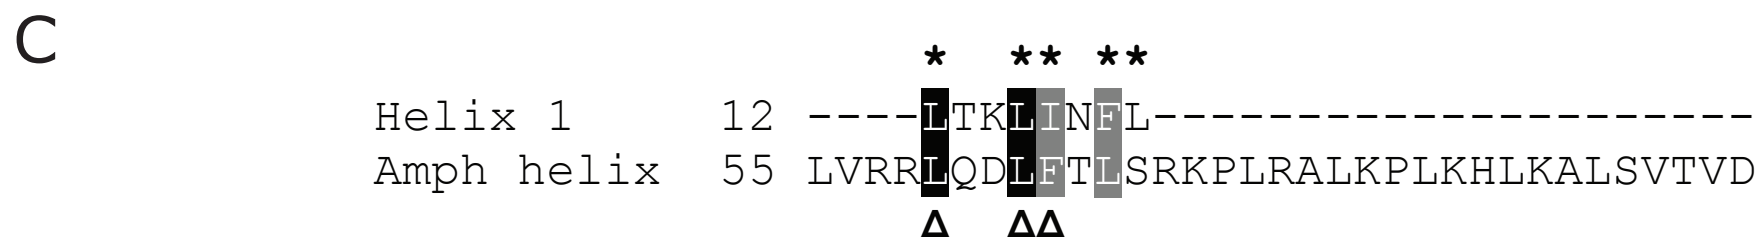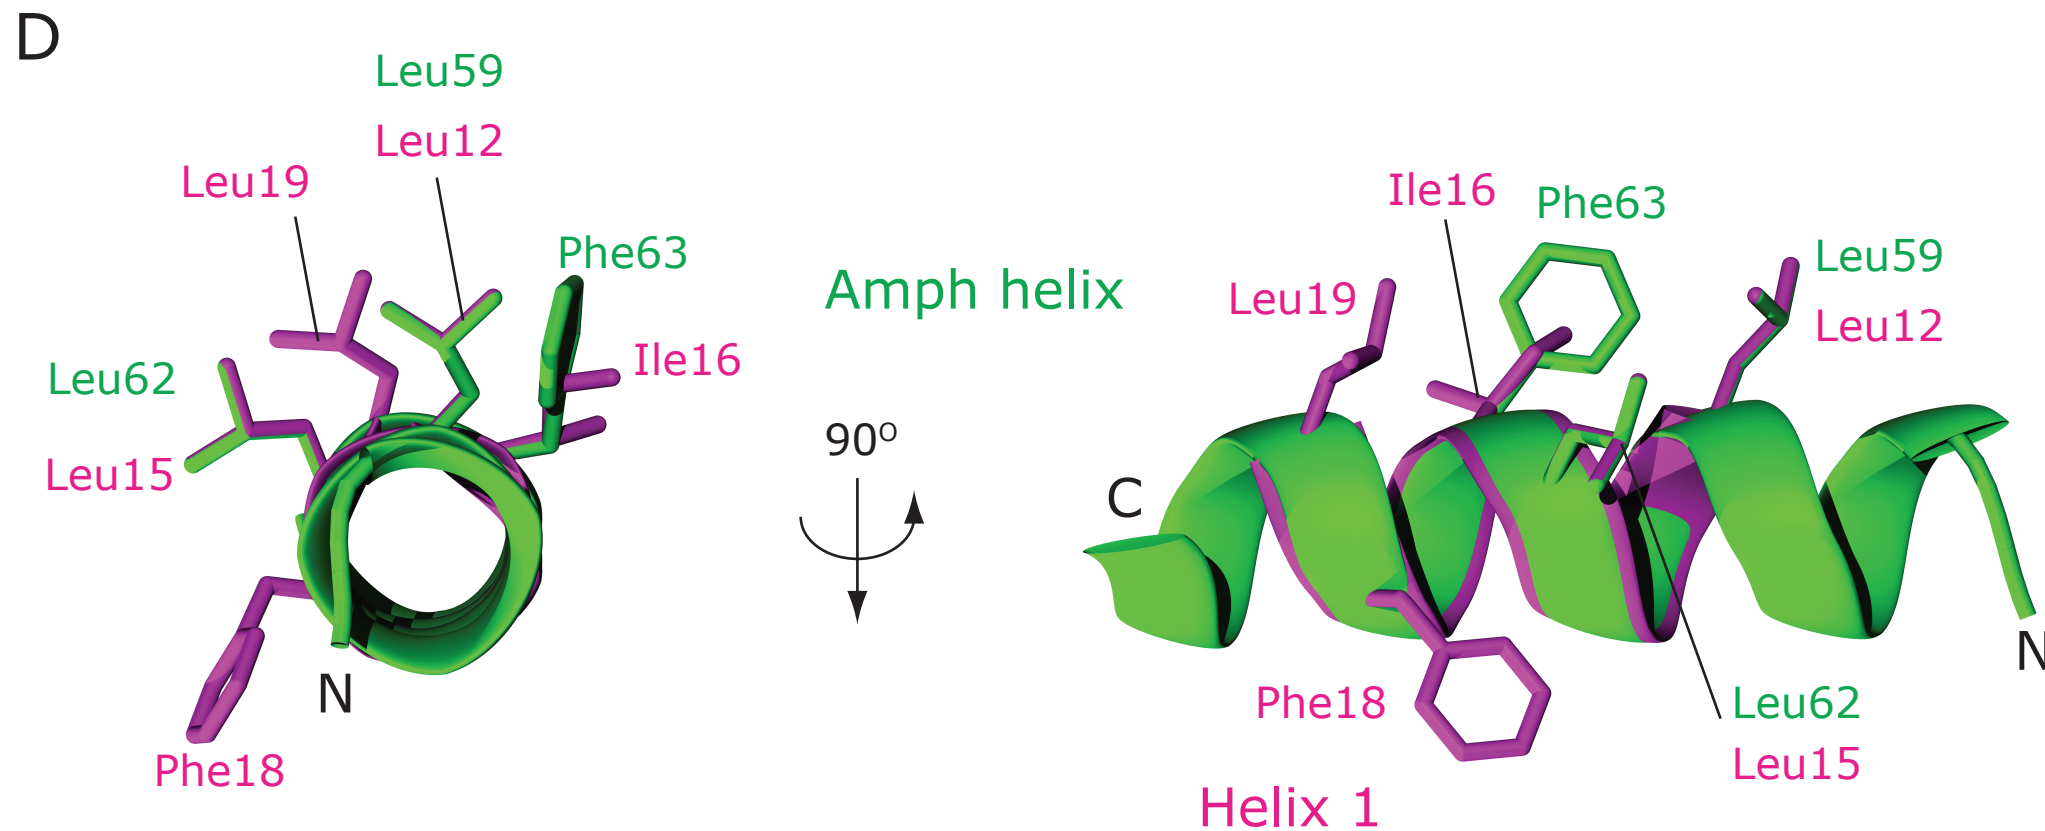

Figure S3

A

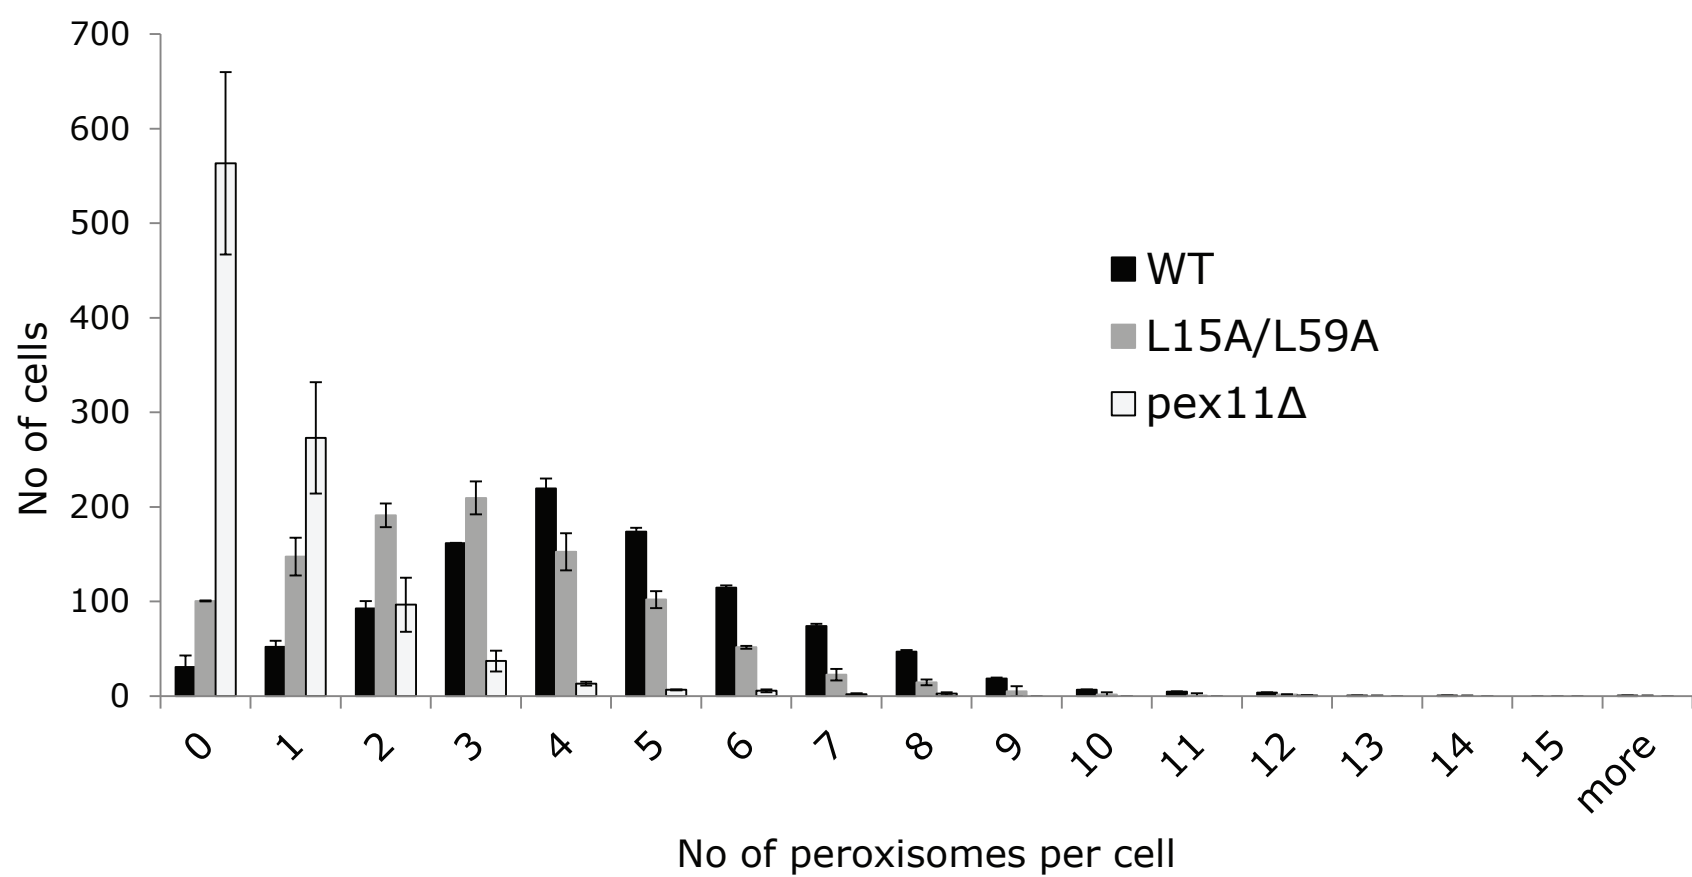

B

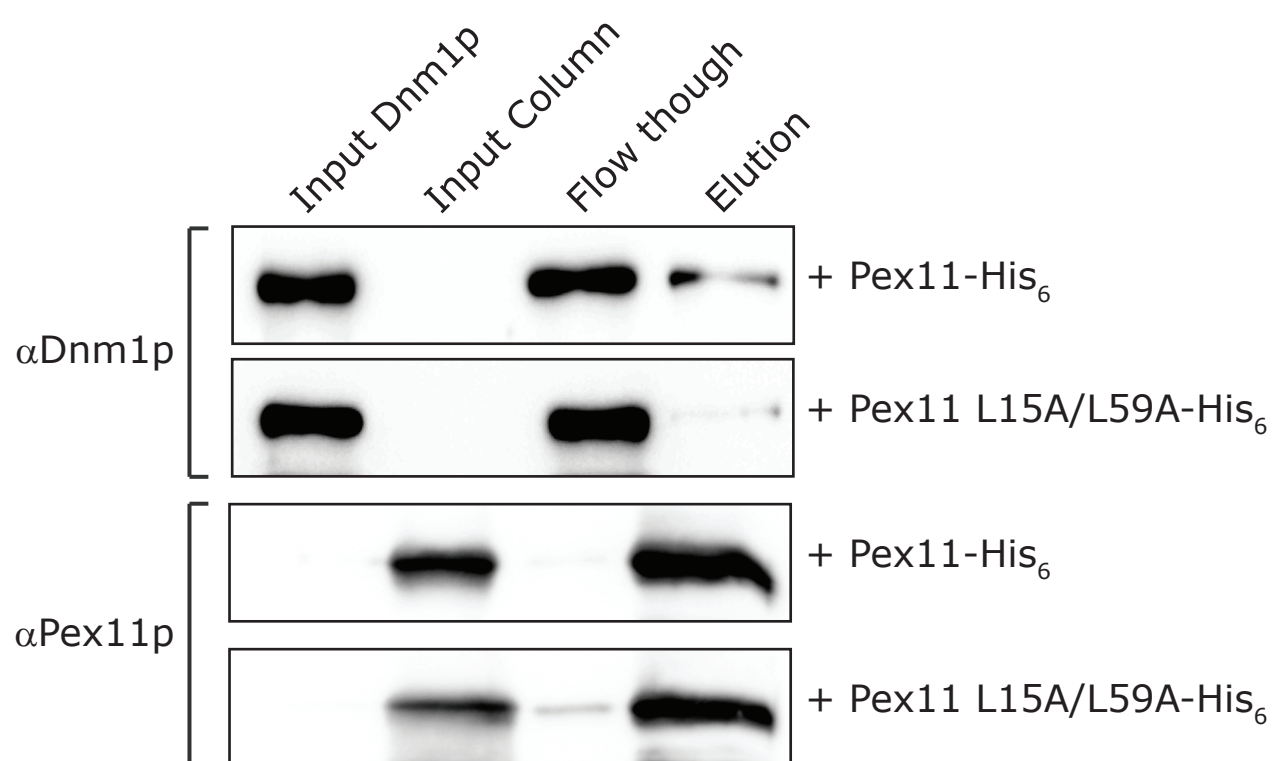

C

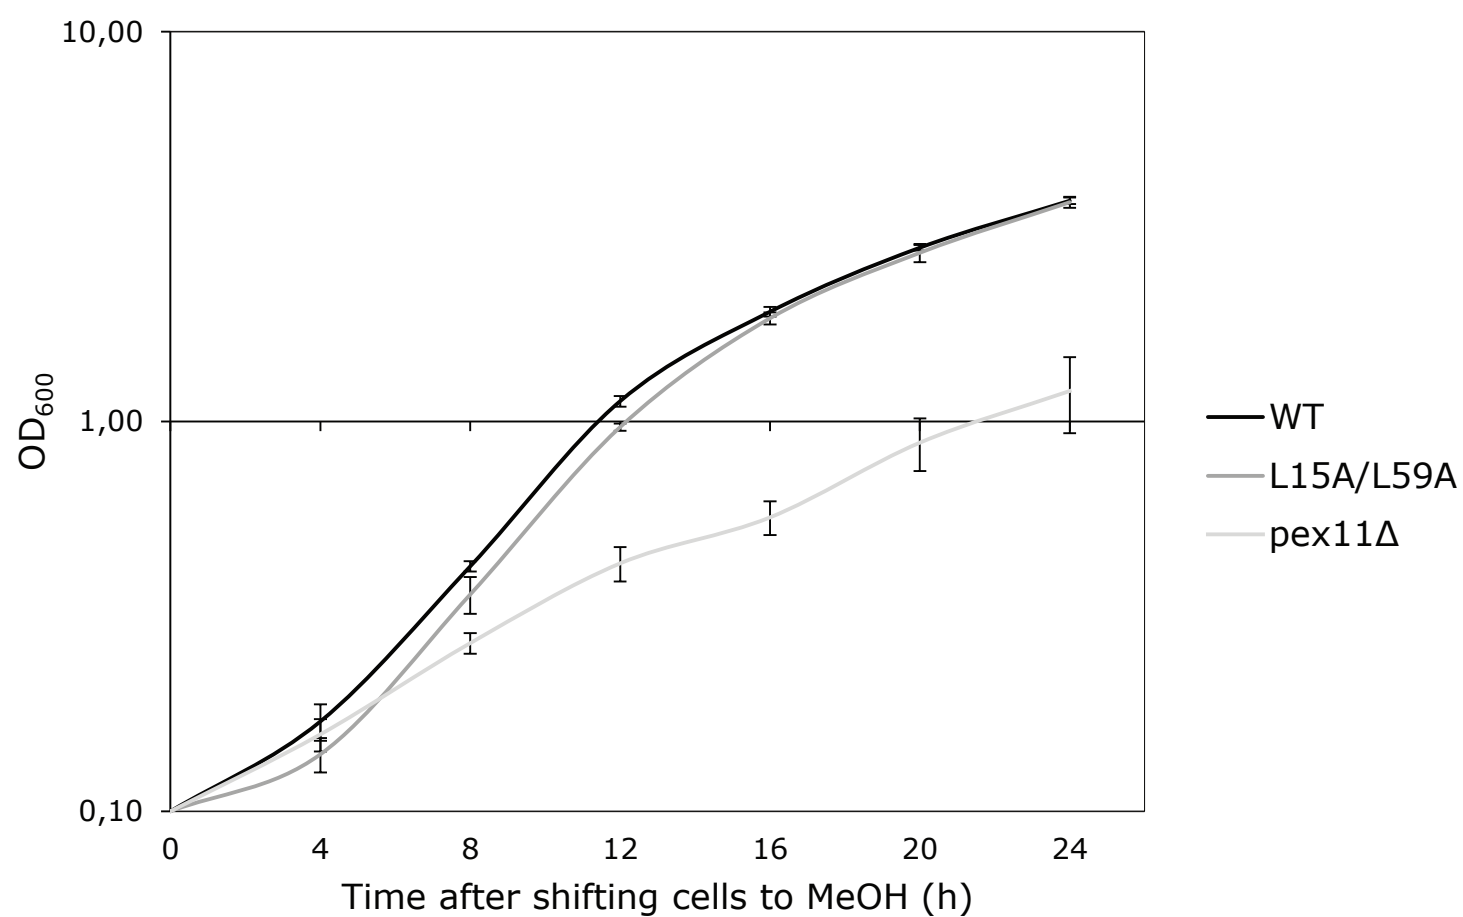

Figure S4

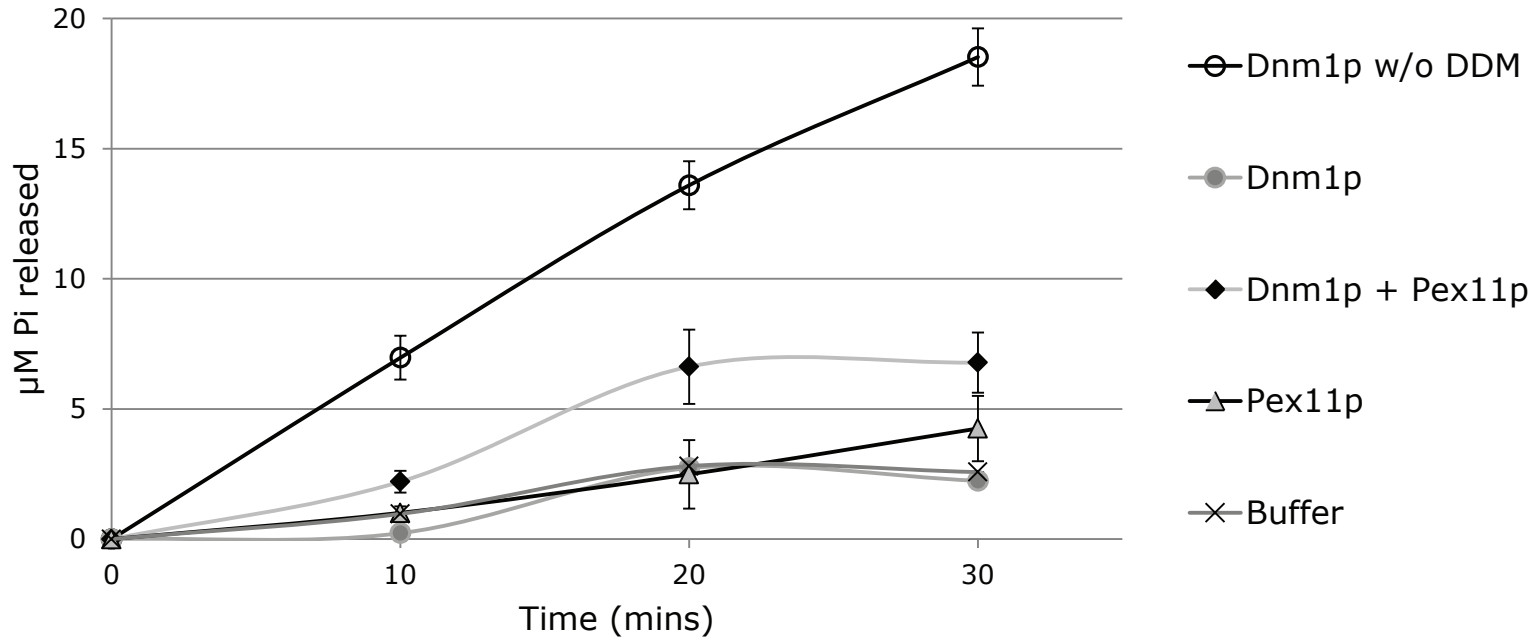

Figure S5

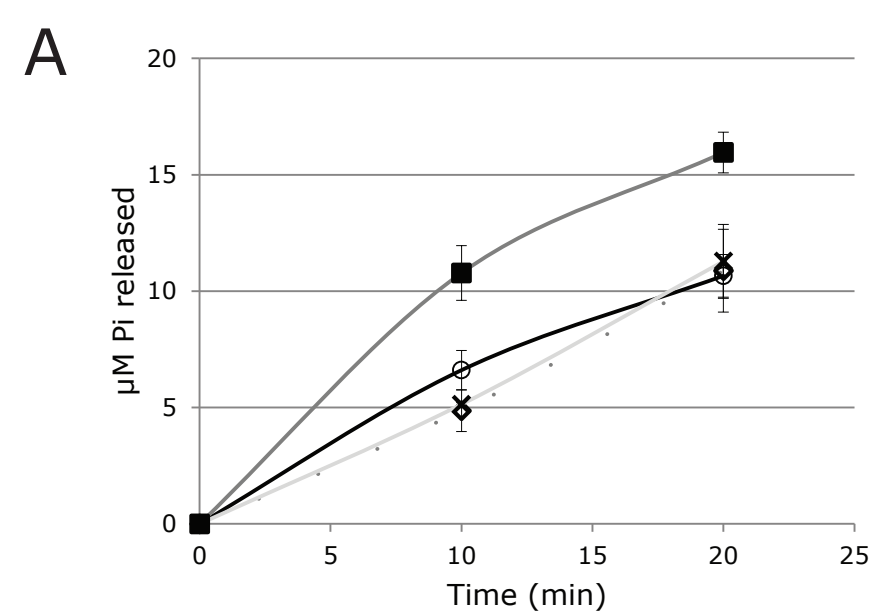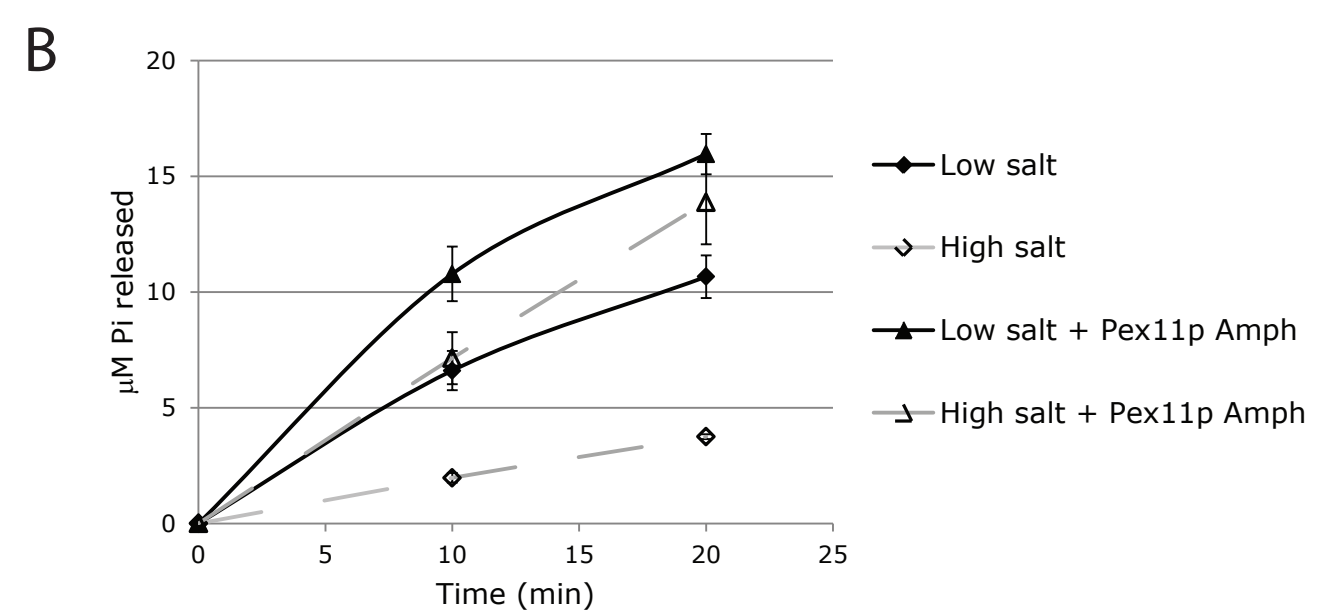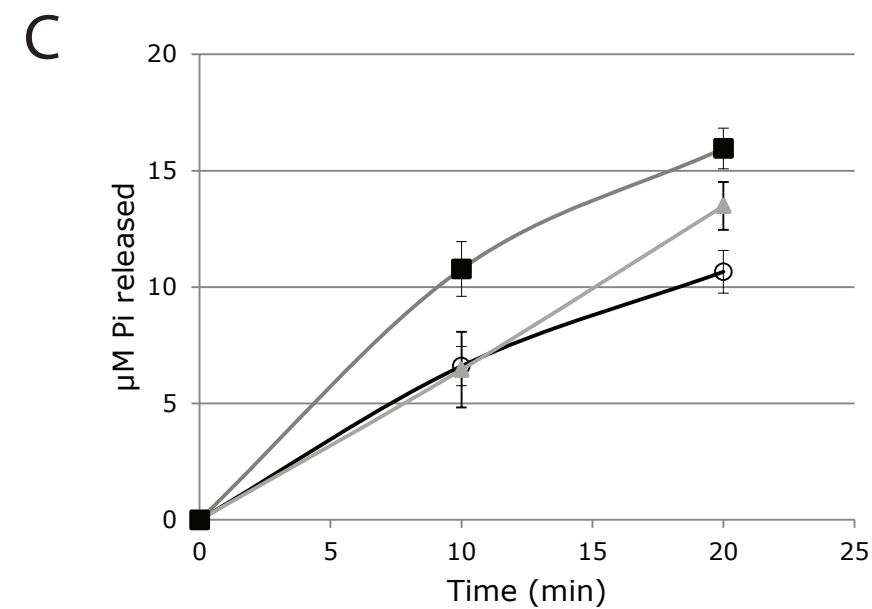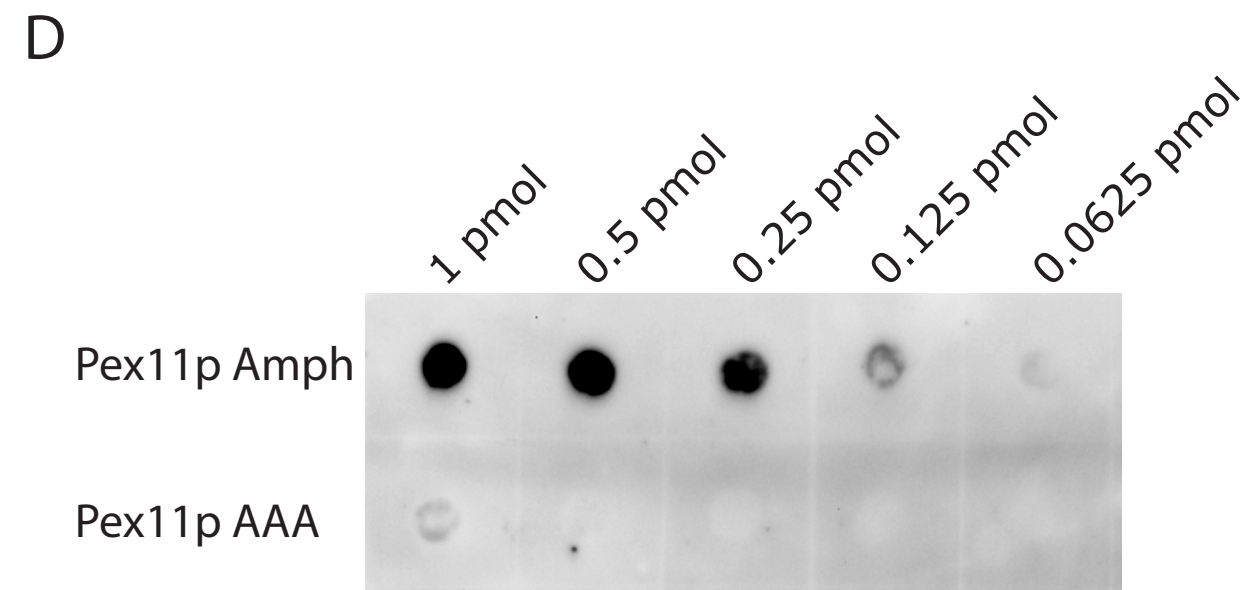

Figure S6



A

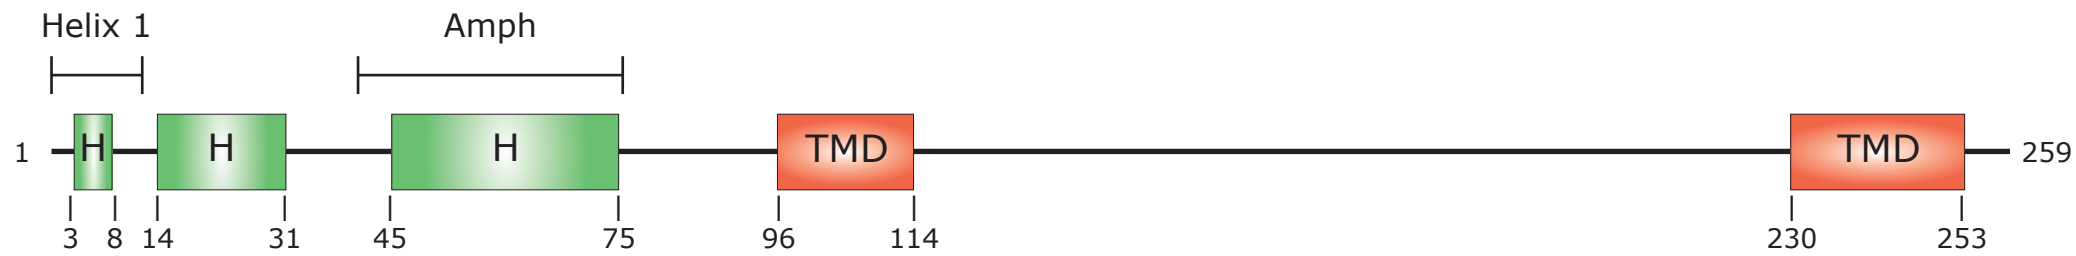

B

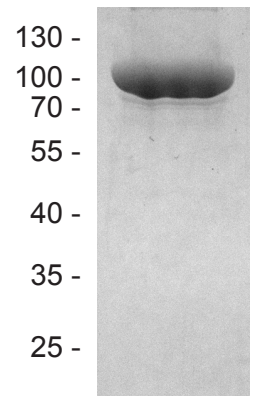

C

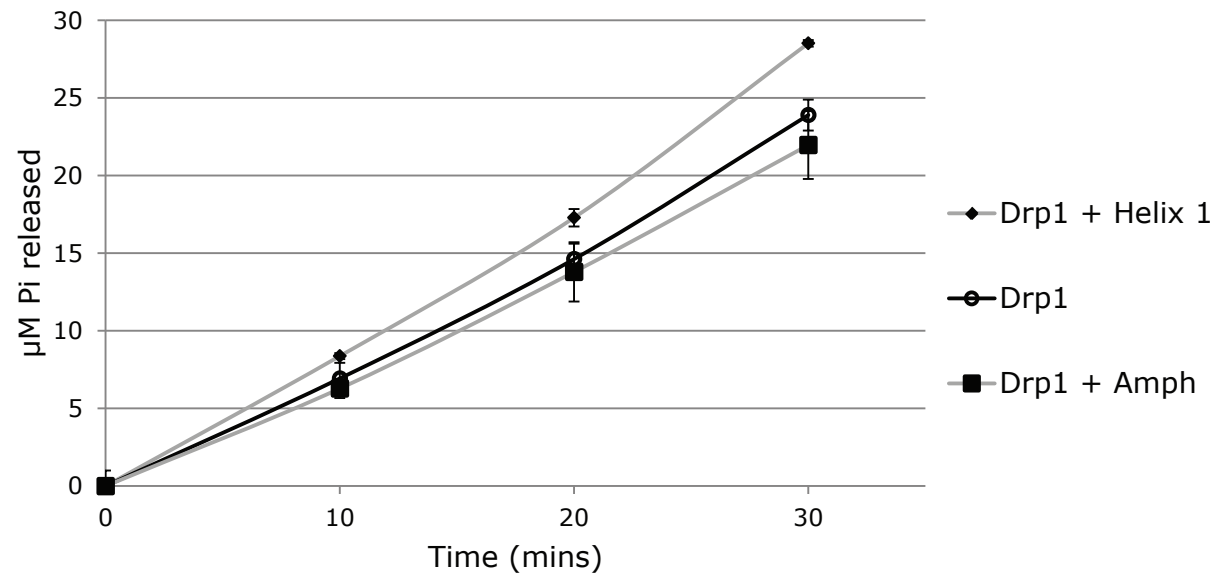

D

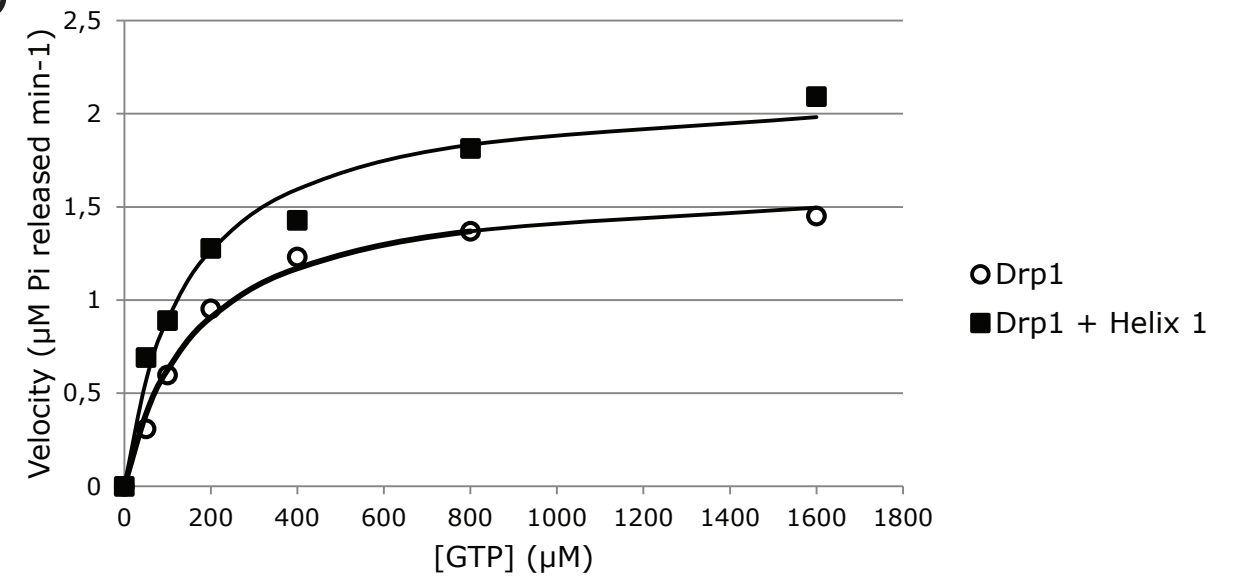

E

|                                          | Drp1        | Drp1 + Pex11β Helix 1 |
|------------------------------------------|-------------|-----------------------|
| Vmax (µM Pi released min <sup>-1</sup> ) | 1.63 ± 0.03 | **2.13 ± 0.04         |
| Kcat (min <sup>-1</sup> )                | 4.07 ± 0.08 | **5.32 ± 0.09         |
| Km (µM)                                  | 150 ± 18    | 148 ± 10              |

Figure S7

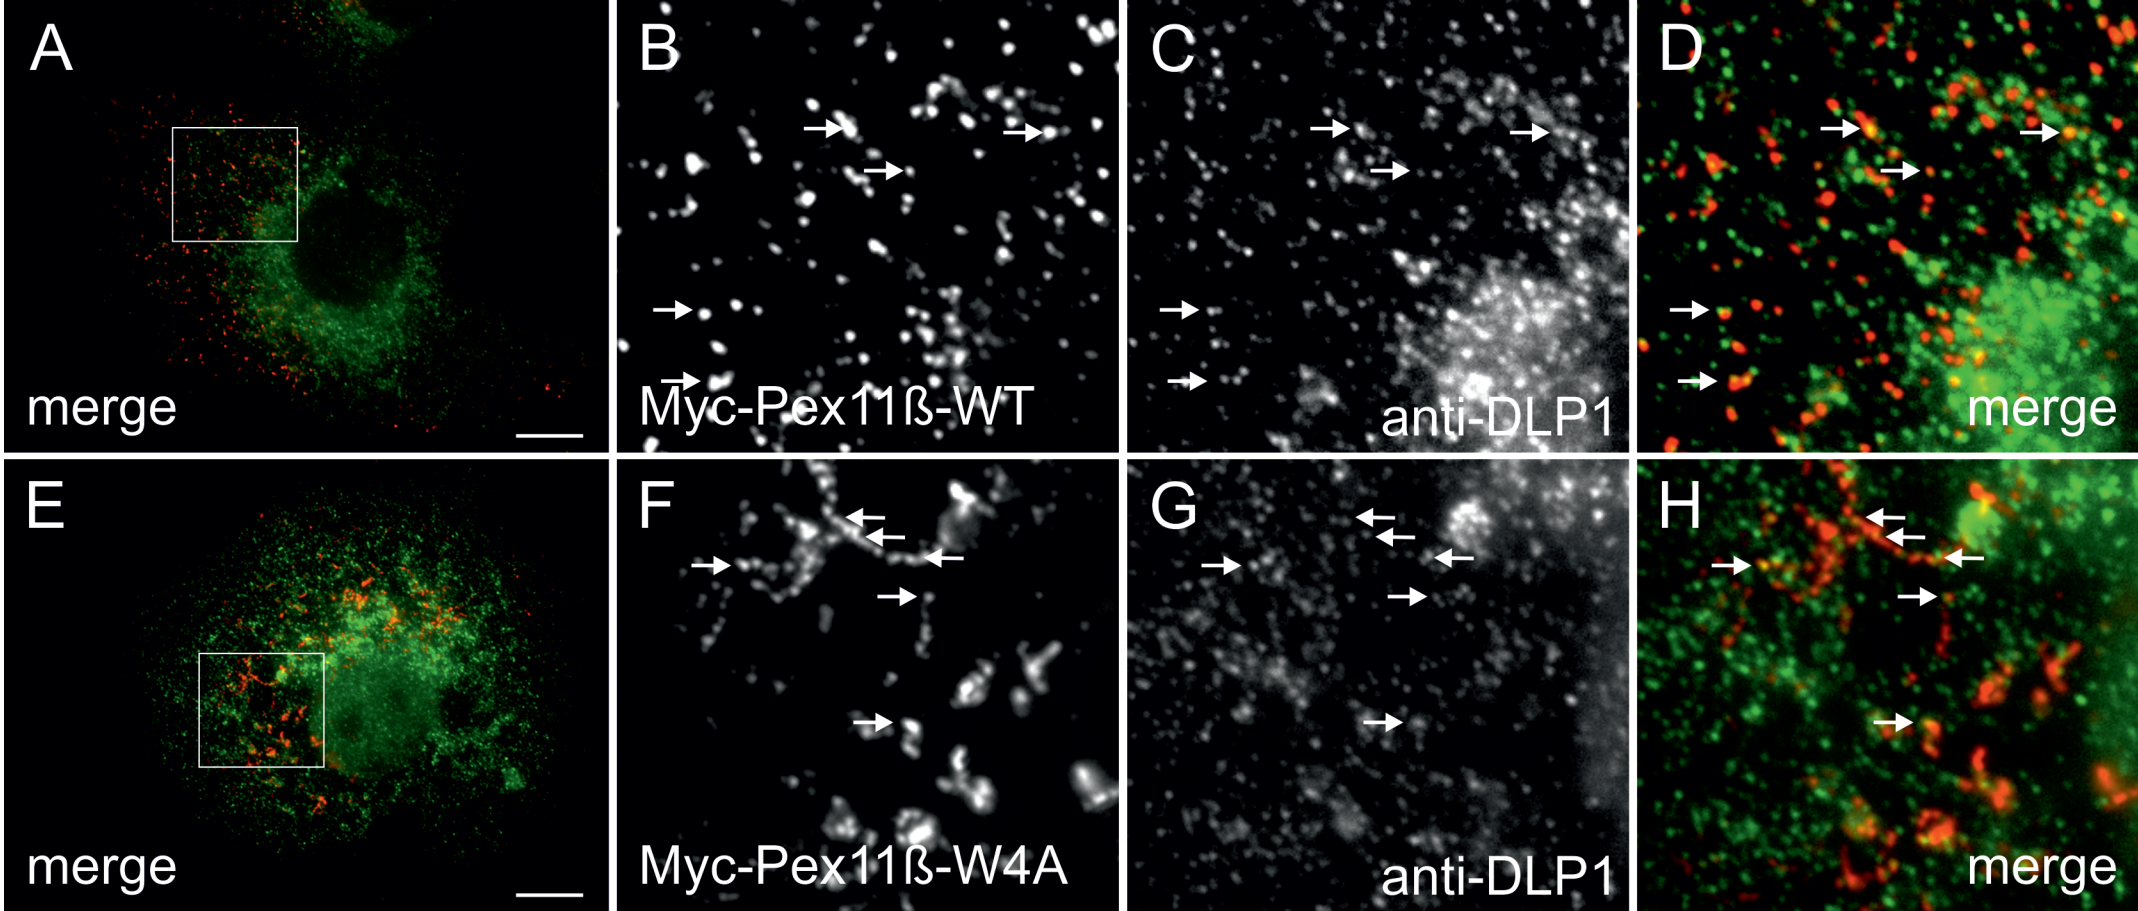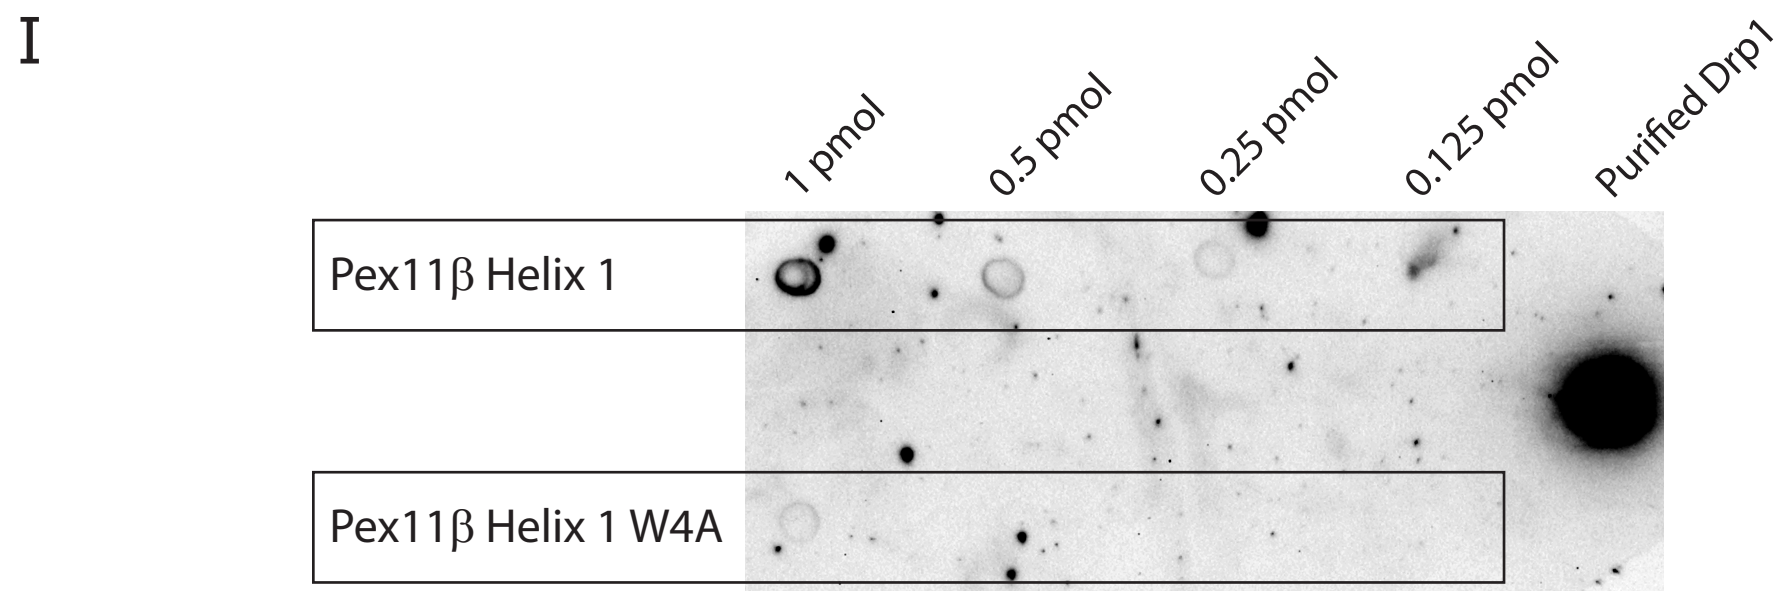

Figure S8

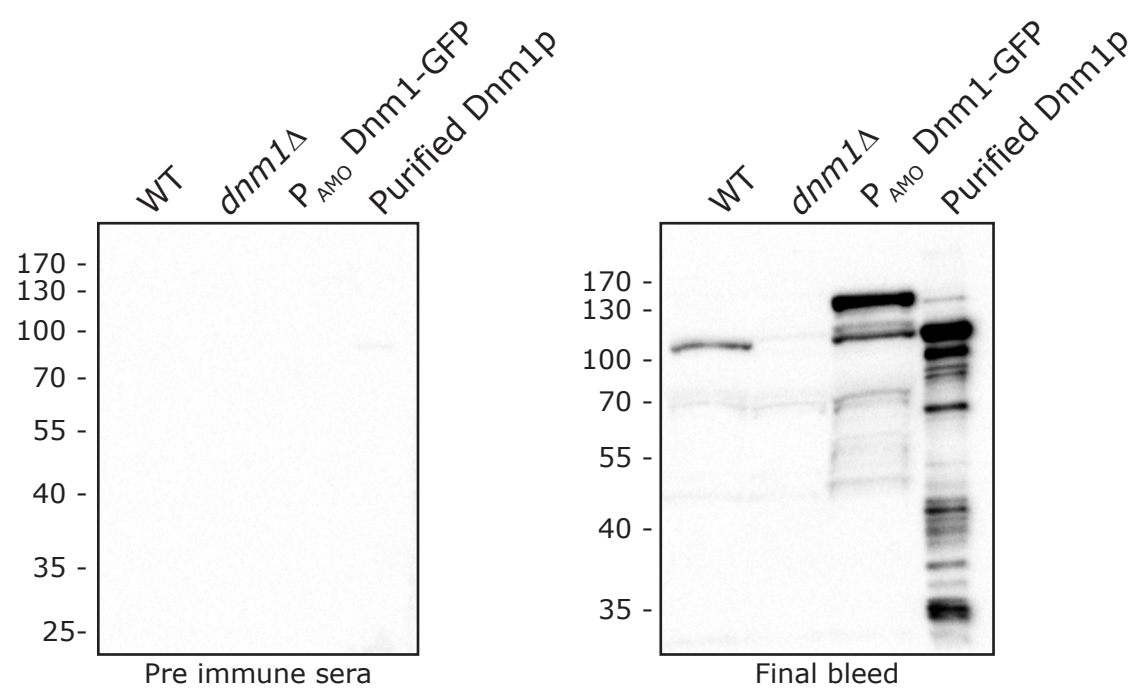

Figure S9
